# Supplementary material for: The goal of ape pointing
Source: PLoS One. 2018 Apr 25;13(4):e0195182. doi: 10.1371/journal.pone.0195182 (PMC5918613; doi:10.1371/journal.pone.0195182)
Supplement: S1 Table — The 1,690 pointing gestures recorded across the motivational (M), failed-look (F), and successful-look (S) conditions. Data include point durations (in seconds), hand used (left or right), eye contact (yes or no), point direction (left, right, or center), and grape position (left or right). (XLSX) [file pone.0195182.s001.xlsx]

## Sheet: SI_Table
Subject	Condition	Session	Trial	Start Time (s)	End Time (s)	Point Duration (s)	Hand	Eye Contact	Point Direction	Grape Position	Correct?	Object Received	Experimenter
Alex	F	1	1	0	0	0	L	N	L	L	C	0	2
Alex	F	1	1	1	3	2	L	Y	L	L	C	0	2
Alex	F	1	1	4	4	0	L	N	L	L	C	0	2
Alex	F	1	1	6	6	0	L	Y	L	L	C	0	2
Alex	F	1	1	15	17	2	L	N	L	L	C	0	2
Alex	F	1	1	18	18	0	L	N	C	L	InC	0	2
Alex	F	1	1	26	27	1	L	N	L	L	C	0	2
Alex	F	1	1	30	32	2	L	Y	L	L	C	0	2
Alex	F	1	1	33	33	0	L	Y	L	L	C	0	2
Alex	F	1	1	56	56	0	L	N	L	L	C	0	2
Alex	F	1	1	57	58	1	L	N	L	L	C	0	2
Alex	F	1	1	60	63	3	L	N	L	L	C	0	2
Alex	F	1	1	68	69	1	L	N	L	L	C	0	2
Alex	F	1	1	71	72	1	L	N	L	L	C	0	2
Alex	F	1	1	77	77	0	L	N	L	L	C	0	2
Alex	F	1	1	87	88	1	L	Y	L	L	C	0	2
Alex	F	1	1	90	91	1	L	Y	L	L	C	0	2
Alex	F	1	1	91	92	1	L	N	L	L	C	0	2
Alex	F	1	1	106	108	2	L	N	L	L	C	0	2
Alex	F	1	2	2	2	0	L	N	C	R	InC	0	2
Alex	F	1	2	3	3	0	L	Y	R	R	C	0	2
Alex	F	1	2	11	12	1	L	N	C	R	InC	0	2
Alex	F	1	2	14	17	3	L	N	C	R	InC	0	2
Alex	F	1	2	17	18	1	L	N	R	R	C	0	2
Alex	F	1	2	19	19	0	L	Y	R	R	C	0	2
Alex	F	1	2	20	23	3	L	Y	L	R	InC	0	2
Alex	F	1	2	24	28	4	L	Y	R	R	C	0	2
Alex	F	1	2	102	102	0	L	N	R	R	C	0	2
Alex	F	2	1	3	3	0	L	Y	L	L	C	0	2
Alex	F	2	1	7	8	1	L	N	L	L	C	0	2
Alex	F	2	1	9	10	1	L	Y	L	L	C	0	2
Alex	F	2	1	15	16	1	L	N	L	L	C	0	2
Alex	F	2	1	20	23	3	L	Y	L	L	C	0	2
Alex	F	2	1	24	25	1	L	Y	L	L	C	0	2
Alex	F	2	1	26	28	2	L	N	C	L	InC	0	2
Alex	F	2	1	30	31	1	L	Y	L	L	C	0	2
Alex	F	2	1	32	34	2	L	Y	L	L	C	0	2
Alex	F	2	1	50	50	0	L	Y	L	L	C	0	2
Alex	F	2	1	51	54	3	L	Y	L	L	C	0	2
Alex	F	2	1	59	60	1	L	Y	L	L	C	0	2
Alex	F	2	1	85	85	0	L	Y	L	L	C	0	2
Alex	F	2	1	86	89	3	L	Y	L	L	C	0	2
Alex	F	2	1	94	99	5	L	Y	L	L	C	0	2
Alex	F	2	2	2	3	1	R	N	R	R	C	0	2
Alex	F	2	2	8	8	0	L	Y	R	R	C	0	2
Alex	F	2	2	11	12	1	L	Y	R	R	C	0	2
Alex	M	1	1	0	1	1	L	Y	L	L	C	1	3
Alex	M	1	1	11	13	2	L	Y	L	L	C	1	3
Alex	M	1	1	13	13	0	L	N	L	L	C	0	3
Alex	M	1	1	15	16	1	L	N	L	L	C	0	3
Alex	M	1	1	26	27	1	L	N	L	L	C	0	3
Alex	M	1	1	28	30	2	L	N	L	L	C	0	3
Alex	M	1	1	31	33	2	L	Y	L	L	C	1	3
Alex	M	1	1	47	48	1	L	N	L	L	C	0	3
Alex	M	1	1	49	49	0	L	Y	L	L	C	1	3
Alex	M	1	1	58	60	2	L	N	L	L	C	0	3
Alex	M	1	1	62	62	0	L	Y	L	L	C	1	3
Alex	M	1	1	64	65	1	L	N	L	L	C	0	3
Alex	M	1	2	4	5	1	L	N	R	R	C	0	3
Alex	M	1	2	7	7	0	L	Y	R	R	C	1	3
Alex	M	1	2	17	18	1	L	N	R	R	C	0	3
Alex	M	1	2	19	19	0	L	N	R	R	C	0	3
Alex	M	1	2	20	20	0	L	N	R	R	C	0	3
Alex	M	1	2	21	21	0	L	Y	R	R	C	1	3
Alex	M	1	2	36	37	1	L	N	C	R	InC	0	3
Alex	M	1	2	38	39	1	L	Y	R	R	C	1	3
Alex	M	1	2	40	40	0	L	N	R	R	C	0	3
Alex	M	1	2	52	56	4	L	Y	R	R	C	1	3
Alex	M	1	2	79	79	0	L	Y	R	R	C	1	3
Alex	M	1	2	77	78	1	L	N	R	R	C	0	3
Alex	M	1	2	80	80	0	L	N	R	R	C	0	3
Alex	M	2	1	0	1	1	L	N	R	L	InC	0	3
Alex	M	2	1	3	4	1	L	N	L	L	C	0	3
Alex	M	2	1	7	8	1	L	N	L	L	C	0	3
Alex	M	2	1	16	17	1	L	Y	L	L	C	1	3
Alex	M	2	1	30	32	2	L	Y	L	L	C	0	3
Alex	M	2	1	47	48	1	L	Y	L	L	C	1	3
Alex	M	2	1	60	61	1	L	N	L	L	C	0	3
Alex	M	2	1	68	69	1	L	Y	L	L	C	1	3
Alex	M	2	1	70	70	0	L	N	L	L	C	0	3
Alex	M	2	1	72	72	0	L	Y	L	L	C	0	3
Alex	M	2	1	83	83	0	L	Y	L	L	C	1	3
Alex	M	2	1	84	84	0	L	N	L	L	C	0	3
Alex	M	2	1	94	95	1	L	Y	L	L	C	1	3
Alex	M	2	1	96	96	0	L	N	L	L	C	0	3
Alex	M	2	2	1	2	1	L	N	R	R	C	0	3
Alex	M	2	2	3	4	1	L	Y	R	R	C	1	3
Alex	M	2	2	21	21	0	L	N	R	R	C	0	3
Alex	M	2	2	22	23	1	L	Y	R	R	C	1	3
Alex	M	2	2	24	25	1	L	N	R	R	C	0	3
Alex	M	2	2	40	41	1	L	Y	R	R	C	1	3
Alex	M	2	2	42	42	0	L	N	R	R	C	0	3
Alex	M	2	2	49	50	1	L	N	R	R	C	0	3
Alex	M	2	2	51	52	1	L	N	R	R	C	0	3
Alex	M	2	2	53	53	0	L	Y	R	R	C	1	3
Alex	M	2	2	54	54	0	L	N	R	R	C	0	3
Alex	M	2	2	63	64	1	L	N	C	R	InC	0	3
Alex	M	2	2	65	65	0	L	N	R	R	C	0	3
Alex	M	2	2	66	66	0	L	N	R	R	C	0	3
Alex	M	2	2	67	67	0	L	N	R	R	C	0	3
Alex	M	2	2	69	69	0	L	N	C	R	InC	0	3
Alex	M	2	2	70	70	0	L	Y	R	R	C	1	3
Alex	M	3	1	64	65	1	L	N	C	L	InC	0	3
Alex	M	3	1	6	7	1	L	Y	L	L	C	1	3
Alex	M	3	1	19	20	1	L	N	L	L	C	0	3
Alex	M	3	1	22	22	0	L	N	L	L	C	0	3
Alex	M	3	1	24	24	0	L	N	C	L	InC	0	3
Alex	M	3	1	26	27	1	L	N	L	L	C	0	3
Alex	M	3	1	31	31	0	L	Y	L	L	C	1	3
Alex	M	3	1	43	43	0	L	N	L	L	C	0	3
Alex	M	3	1	44	45	1	L	N	L	L	C	0	3
Alex	M	3	1	46	46	0	L	N	C	L	InC	0	3
Alex	M	3	1	47	48	1	L	N	C	L	InC	0	3
Alex	M	3	1	50	50	0	L	N	R	L	InC	0	3
Alex	M	3	1	51	52	1	L	Y	L	L	C	1	3
Alex	M	3	1	66	66	0	L	N	L	L	C	0	3
Alex	M	3	1	67	68	1	L	N	L	L	C	0	3
Alex	M	3	1	69	69	0	L	N	C	L	InC	0	3
Alex	M	3	1	70	71	1	L	N	L	L	C	0	3
Alex	M	3	1	75	75	0	L	N	C	L	InC	0	3
Alex	M	3	1	78	79	1	L	N	L	L	C	0	3
Alex	M	3	1	83	85	2	L	Y	L	L	C	1	3
Alex	M	3	1	95	95	0	L	N	L	L	C	0	3
Alex	M	3	1	96	97	1	L	N	L	L	C	0	3
Alex	M	3	1	99	99	0	L	N	C	L	InC	0	3
Alex	M	3	1	100	100	0	L	N	L	L	C	0	3
Alex	M	3	1	102	103	1	L	N	L	L	C	0	3
Alex	M	3	1	107	107	0	L	N	C	L	InC	0	3
Alex	M	3	1	112	113	1	L	N	L	L	C	0	3
Alex	M	3	1	117	117	0	L	N	C	L	InC	0	3
Alex	M	3	2	1	1	0	L	Y	R	R	C	0	3
Alex	M	3	2	2	2	0	L	Y	R	R	C	1	3
Alex	M	3	2	17	17	0	L	N	R	R	C	0	3
Alex	M	3	2	18	19	1	L	N	R	R	C	0	3
Alex	M	3	2	19	20	1	L	N	R	R	C	0	3
Alex	M	3	2	23	24	1	L	Y	R	R	C	1	3
Alex	M	3	2	25	25	0	L	N	R	R	C	0	3
Alex	M	3	2	27	27	0	L	N	R	R	C	0	3
Alex	M	3	2	34	35	1	L	N	R	R	C	0	3
Alex	M	3	2	35	36	1	L	N	R	R	C	0	3
Alex	M	3	2	37	40	3	L	Y	R	R	C	1	3
Alex	M	3	2	49	49	0	L	N	R	R	C	0	3
Alex	M	3	2	50	50	0	L	N	R	R	C	0	3
Alex	M	3	2	52	52	0	L	Y	R	R	C	0	3
Alex	M	3	2	57	57	0	L	N	R	R	C	0	3
Alex	M	3	2	59	60	1	L	Y	R	R	C	1	3
Alex	M	3	2	69	69	0	L	N	R	R	C	0	3
Alex	M	3	2	71	71	0	L	N	R	R	C	0	3
Alex	M	3	2	72	72	0	L	N	R	R	C	0	3
Alex	M	3	2	75	75	0	L	N	R	R	C	0	3
Alex	M	3	2	76	77	1	L	Y	R	R	C	1	3
Alex	M	3	2	78	78	0	L	N	R	R	C	0	3
Alex	M	3	2	79	79	0	L	N	R	R	C	0	3
Alex	M	4	1	9	9	0	L	Y	L	L	C	1	3
Alex	M	4	1	21	21	0	L	Y	L	L	C	1	3
Alex	M	4	1	23	23	0	L	N	L	L	C	0	3
Alex	M	4	1	32	32	0	L	N	L	L	C	0	3
Alex	M	4	1	34	35	1	L	Y	L	L	C	0	3
Alex	M	4	1	39	40	1	L	N	L	L	C	0	3
Alex	M	4	1	44	46	2	L	Y	L	L	C	1	3
Alex	M	4	1	55	55	0	L	Y	L	L	C	1	3
Alex	M	4	1	56	57	1	L	Y	L	L	C	0	3
Alex	M	4	1	67	68	1	L	N	L	L	C	0	3
Alex	M	4	1	69	69	0	L	Y	L	L	C	0	3
Alex	M	4	1	70	70	0	L	N	L	L	C	0	3
Alex	M	4	1	71	72	1	L	N	L	L	C	0	3
Alex	M	4	1	73	74	1	L	Y	C	L	InC	0	3
Alex	M	4	1	75	76	1	L	N	L	L	C	0	3
Alex	M	4	1	78	78	0	L	N	C	L	InC	0	3
Alex	M	4	1	81	82	1	L	Y	L	L	C	1	3
Alex	M	4	2	2	2	0	L	Y	R	R	C	1	3
Alex	M	4	2	12	12	0	L	N	R	R	C	0	3
Alex	M	4	2	13	14	1	L	Y	R	R	C	1	3
Alex	M	4	2	14	15	1	L	N	R	R	C	0	3
Alex	M	4	2	16	17	1	L	N	R	R	C	0	3
Alex	M	4	2	22	22	0	L	N	R	R	C	0	3
Alex	M	4	2	23	24	1	L	Y	R	R	C	1	3
Alex	M	4	2	25	25	0	L	N	R	R	C	0	3
Alex	M	4	2	34	34	0	L	N	R	R	C	0	3
Alex	M	4	2	35	35	0	L	N	R	R	C	0	3
Alex	M	4	2	36	37	1	L	N	R	R	C	0	3
Alex	M	4	2	40	41	1	L	N	R	R	C	0	3
Alex	M	4	2	42	42	0	L	Y	R	R	C	1	3
Alex	M	4	2	55	56	1	L	N	R	R	C	0	3
Alex	M	4	2	57	58	1	L	Y	R	R	C	1	3
Alex	M	4	2	58	59	1	L	N	R	R	C	0	3
Alex	S	1	1	4	4	0	L	N	L	L	C	0	1
Alex	S	1	1	5	6	1	L	Y	L	L	C	0	1
Alex	S	1	1	11	14	3	L	Y	L	L	C	0	1
Alex	S	1	1	15	16	1	L	Y	L	L	C	0	1
Alex	S	1	1	18	19	1	L	Y	L	L	C	0	1
Alex	S	1	1	22	23	1	L	Y	L	L	C	0	1
Alex	S	1	1	24	26	2	L	Y	L	L	C	0	1
Alex	S	1	1	27	29	2	L	Y	L	L	C	0	1
Alex	S	1	1	34	34	0	L	N	C	L	InC	0	1
Alex	S	1	1	36	40	4	L	Y	L	L	C	0	1
Alex	S	1	1	44	45	1	L	N	L	L	C	0	1
Alex	S	1	1	48	49	1	L	N	L	L	C	0	1
Alex	S	1	1	60	63	3	L	Y	L	L	C	0	1
Alex	S	1	1	64	70	6	L	Y	L	L	C	0	1
Alex	S	1	1	97	99	2	L	N	L	L	C	0	1
Alex	S	1	1	103	103	0	L	N	L	L	C	0	1
Alex	S	1	1	104	113	9	L	N	L	L	C	0	1
Alex	S	1	1	113	120	7	L	Y	L	L	C	0	1
Alex	S	1	2	3	4	1	L	Y	R	R	C	0	1
Alex	S	1	2	5	6	1	L	N	R	R	C	0	1
Alex	S	1	2	6	7	1	L	Y	R	R	C	0	1
Alex	S	1	2	8	11	3	L	Y	R	R	C	0	1
Alex	S	1	2	12	14	2	L	Y	R	R	C	0	1
Alex	S	1	2	14	15	1	L	N	R	R	C	0	1
Alex	S	1	2	19	25	6	L	Y	R	R	C	0	1
Alex	S	1	2	75	75	0	L	Y	C	R	InC	0	1
Alex	S	1	2	76	77	1	L	Y	C	R	InC	0	1
Alex	S	1	2	80	81	1	L	N	C	R	InC	0	1
Alex	S	1	2	88	90	2	L	N	R	R	C	0	1
Alex	S	1	2	103	104	1	L	N	C	R	InC	0	1
Alex	S	2	1	4	5	1	L	Y	L	L	C	0	1
Alex	S	2	1	7	9	2	L	N	L	L	C	0	1
Alex	S	2	1	10	11	1	L	N	L	L	C	0	1
Alex	S	2	1	22	23	1	L	N	L	L	C	0	1
Alex	S	2	1	25	28	3	L	Y	L	L	C	0	1
Alex	S	2	1	36	37	1	L	N	L	L	C	0	1
Alex	S	2	2	2	2	0	L	Y	R	R	C	0	1
Alex	S	2	2	3	3	0	L	N	R	R	C	0	1
Alex	S	2	2	4	6	2	L	Y	R	R	C	0	1
Alex	S	2	2	8	8	0	L	N	C	R	InC	0	1
Alex	S	2	2	10	10	0	L	N	R	R	C	0	1
Alex	S	2	2	12	14	2	L	N	C	R	InC	0	1
Alex	S	2	2	21	29	8	L	Y	C	R	InC	0	1
Alexandra	F	1	1	0	0	0	L	Y	L	L	C	0	2
Alexandra	F	1	1	3	8	5	L	Y	L	L	C	0	2
Alexandra	F	1	1	8	11	3	L	Y	L	L	C	0	2
Alexandra	F	1	1	12	15	3	R	Y	L	L	C	0	2
Alexandra	F	1	1	15	18	3	R	Y	L	L	C	0	2
Alexandra	F	1	1	20	27	7	L	Y	L	L	C	0	2
Alexandra	F	1	1	28	34	6	L	Y	L	L	C	0	2
Alexandra	F	1	1	34	36	2	L	Y	L	L	C	0	2
Alexandra	F	1	1	44	54	10	L	Y	L	L	C	0	2
Alexandra	F	1	1	55	59	4	L	Y	L	L	C	0	2
Alexandra	F	1	1	92	92	0	R	N	L	L	C	0	2
Alexandra	F	1	1	94	97	3	L	Y	L	L	C	0	2
Alexandra	F	1	1	98	103	5	L	Y	L	L	C	0	2
Alexandra	F	1	2	0	3	3	L	Y	R	R	C	0	2
Alexandra	F	1	2	4	6	2	L	Y	R	R	C	0	2
Alexandra	F	1	2	12	15	3	R	Y	R	R	C	0	2
Alexandra	F	1	2	118	119	1	L	N	L	R	InC	0	2
Alexandra	F	2	1	0	2	2	L	Y	L	L	C	0	2
Alexandra	F	2	1	3	9	6	R	Y	L	L	C	0	2
Alexandra	F	2	1	15	18	3	L	Y	L	L	C	0	2
Alexandra	F	2	1	107	110	3	L	Y	L	L	C	0	2
Alexandra	F	2	2	1	2	1	R	Y	R	R	C	0	2
Alexandra	F	2	2	3	6	3	L	Y	R	R	C	0	2
Alexandra	M	1	1	1	8	7	L	Y	L	L	C	1	3
Alexandra	M	1	1	27	29	2	L	Y	L	L	C	0	3
Alexandra	M	1	1	30	37	7	L	Y	L	L	C	1	3
Alexandra	M	1	1	56	65	9	L	Y	L	L	C	1	3
Alexandra	M	1	1	79	89	10	L	Y	L	L	C	1	3
Alexandra	M	1	1	102	107	5	L	Y	L	L	C	1	3
Alexandra	M	1	2	0	7	7	L	Y	L	R	InC	0	3
Alexandra	M	1	2	7	13	6	L	Y	R	R	C	1	3
Alexandra	M	1	2	24	32	8	L	Y	R	R	C	1	3
Alexandra	M	1	2	59	65	6	L	Y	R	R	C	1	3
Alexandra	M	1	2	73	79	6	L	N	R	R	C	0	3
Alexandra	M	1	2	90	91	1	R	N	R	R	C	0	3
Alexandra	M	1	2	93	97	4	L	Y	R	R	C	1	3
Alexandra	M	1	2	101	106	5	L	Y	R	R	C	1	3
Alexandra	M	2	1	0	1	1	L	Y	L	L	C	0	3
Alexandra	M	2	1	4	4	0	L	Y	L	L	C	0	3
Alexandra	M	2	1	5	11	6	L	Y	L	L	C	1	3
Alexandra	M	2	1	49	56	7	L	Y	L	L	C	1	3
Alexandra	M	2	1	73	80	7	L	Y	L	L	C	1	3
Alexandra	M	2	1	91	95	4	L	Y	L	L	C	1	3
Alexandra	M	2	1	99	108	9	L	Y	L	L	C	1	3
Alexandra	M	2	2	0	2	2	L	Y	C	R	InC	0	3
Alexandra	M	2	2	5	8	3	L	N	R	R	C	0	3
Alexandra	M	2	2	8	13	5	R	Y	R	R	C	1	3
Alexandra	M	2	2	19	22	3	L	Y	R	R	C	0	3
Alexandra	M	2	2	23	29	6	L	Y	R	R	C	1	3
Alexandra	M	2	2	35	40	5	L	Y	R	R	C	0	3
Alexandra	M	2	2	41	46	5	L	Y	R	R	C	1	3
Alexandra	M	2	2	52	55	3	L	N	R	R	C	0	3
Alexandra	M	2	2	55	61	6	R	Y	R	R	C	1	3
Alexandra	M	2	2	68	70	2	R	Y	C	R	InC	0	3
Alexandra	M	2	2	71	77	6	L	Y	R	R	C	1	3
Alexandra	M	3	1	1	4	3	R	Y	L	L	C	1	3
Alexandra	M	3	1	5	7	2	L	Y	L	L	C	0	3
Alexandra	M	3	1	10	18	8	L	Y	L	L	C	1	3
Alexandra	M	3	1	26	35	9	L	Y	L	L	C	1	3
Alexandra	M	3	1	42	44	2	L	Y	L	L	C	0	3
Alexandra	M	3	1	45	52	7	L	Y	L	L	C	1	3
Alexandra	M	3	1	62	67	5	L	Y	L	L	C	1	3
Alexandra	M	3	2	1	5	4	R	Y	R	R	C	1	3
Alexandra	M	3	2	14	19	5	L	Y	R	R	C	0	3
Alexandra	M	3	2	21	23	2	L	Y	R	R	C	0	3
Alexandra	M	3	2	23	28	5	R	Y	R	R	C	1	3
Alexandra	M	3	2	35	37	2	L	Y	R	R	C	0	3
Alexandra	M	3	2	38	44	6	R	Y	R	R	C	1	3
Alexandra	M	3	2	57	57	0	L	N	R	R	C	0	3
Alexandra	M	3	2	59	60	1	L	N	R	R	C	0	3
Alexandra	M	3	2	61	68	7	R	Y	R	R	C	1	3
Alexandra	M	3	2	73	75	2	R	Y	R	R	C	1	3
Alexandra	M	3	2	76	78	2	L	Y	R	R	C	0	3
Alexandra	M	4	1	0	3	3	L	Y	L	L	C	0	3
Alexandra	M	4	1	3	4	1	L	Y	L	L	C	1	3
Alexandra	M	4	1	6	9	3	L	Y	L	L	C	0	3
Alexandra	M	4	1	20	27	7	L	Y	L	L	C	1	3
Alexandra	M	4	1	31	34	3	L	Y	L	L	C	0	3
Alexandra	M	4	1	34	40	6	L	Y	L	L	C	1	3
Alexandra	M	4	1	47	54	7	L	Y	L	L	C	1	3
Alexandra	M	4	1	59	67	8	L	Y	L	L	C	1	3
Alexandra	M	4	2	0	1	1	R	Y	R	R	C	0	3
Alexandra	M	4	2	3	3	0	R	N	R	R	C	0	3
Alexandra	M	4	2	15	20	5	L	Y	R	R	C	1	3
Alexandra	M	4	2	25	26	1	L	Y	R	R	C	0	3
Alexandra	M	4	2	25	33	8	R	Y	R	R	C	1	3
Alexandra	M	4	2	38	46	8	L	Y	R	R	C	1	3
Alexandra	M	4	2	56	59	3	L	N	R	R	C	0	3
Alexandra	M	4	2	60	70	10	R	Y	R	R	C	1	3
Alexandra	M	4	2	77	78	1	R	Y	R	R	C	0	3
Alexandra	M	4	2	79	81	2	L	N	R	R	C	0	3
Alexandra	M	4	2	85	90	5	L	Y	L	R	InC	1	3
Alexandra	S	1	1	0	1	1	L	Y	L	L	C	0	1
Alexandra	S	1	1	1	8	7	L	Y	L	L	C	0	1
Alexandra	S	1	1	9	13	4	L	Y	L	L	C	0	1
Alexandra	S	1	1	19	25	6	L	Y	L	L	C	0	1
Alexandra	S	1	1	26	30	4	R	N	L	L	C	0	1
Alexandra	S	1	1	31	35	4	R	Y	L	L	C	0	1
Alexandra	S	1	1	36	56	20	L	Y	L	L	C	0	1
Alexandra	S	1	1	92	103	11	L	Y	L	L	C	0	1
Alexandra	S	1	2	0	4	4	L	N	R	R	C	0	1
Alexandra	S	1	2	4	12	8	L	Y	R	R	C	0	1
Alexandra	S	1	2	12	23	11	L	N	R	R	C	0	1
Alexandra	S	2	1	0	2	2	L	Y	L	L	C	0	1
Alexandra	S	2	1	4	9	5	L	Y	L	L	C	0	1
Alexandra	S	2	1	94	96	2	L	Y	L	L	C	0	1
Alexandra	S	2	2	2	4	2	R	Y	R	R	C	0	1
Annet	F	1	1	2	2	0	L	Y	L	L	C	0	1
Annet	F	1	1	3	3	0	R	Y	L	L	C	0	1
Annet	F	1	1	7	8	1	L	Y	L	L	C	0	1
Annet	F	1	1	9	13	4	R	N	L	L	C	0	1
Annet	F	1	1	15	18	3	R	Y	L	L	C	0	1
Annet	F	1	1	24	27	3	R	N	L	L	C	0	1
Annet	F	1	1	28	29	1	R	Y	L	L	C	0	1
Annet	F	1	1	31	36	5	L	Y	L	L	C	0	1
Annet	F	1	1	37	39	2	L	Y	L	L	C	0	1
Annet	F	1	1	52	54	2	R	Y	L	L	C	0	1
Annet	F	1	1	54	58	4	R	N	L	L	C	0	1
Annet	F	1	1	58	63	5	R	Y	L	L	C	0	1
Annet	F	1	1	65	69	4	L	N	L	L	C	0	1
Annet	F	1	1	72	73	1	L	Y	L	L	C	0	1
Annet	F	1	1	74	75	1	L	Y	L	L	C	0	1
Annet	F	1	1	76	76	0	L	N	L	L	C	0	1
Annet	F	1	1	83	86	3	R	Y	L	L	C	0	1
Annet	F	1	1	89	92	3	R	N	L	L	C	0	1
Annet	F	1	1	99	100	1	R	Y	L	L	C	0	1
Annet	F	1	2	2	3	1	R	Y	R	R	C	0	1
Annet	F	1	2	4	7	3	R	Y	R	R	C	0	1
Annet	F	1	2	10	15	5	L	N	R	R	C	0	1
Annet	F	1	2	15	16	1	L	N	R	R	C	0	1
Annet	F	1	2	84	87	3	R	Y	R	R	C	0	1
Annet	F	1	2	88	98	10	R	Y	R	R	C	0	1
Annet	F	2	1	0	3	3	R	Y	L	L	C	0	1
Annet	F	2	1	4	8	4	R	N	L	L	C	0	1
Annet	F	2	1	9	10	1	R	Y	L	L	C	0	1
Annet	F	2	1	11	12	1	R	Y	L	L	C	0	1
Annet	F	2	1	41	43	2	R	Y	L	L	C	0	1
Annet	F	2	1	45	47	2	R	N	L	L	C	0	1
Annet	F	2	1	48	50	2	R	Y	L	L	C	0	1
Annet	F	2	2	0	2	2	R	Y	R	R	C	0	1
Annet	F	2	2	2	5	3	R	Y	R	R	C	0	1
Annet	F	2	2	6	8	2	R	Y	R	R	C	0	1
Annet	F	2	2	14	15	1	R	Y	R	R	C	0	1
Annet	M	1	1	26	27	1	R	Y	L	L	C	1	3
Annet	M	1	1	26	27	1	L	Y	L	L	C	0	3
Annet	M	1	1	35	38	3	R	Y	L	L	C	0	3
Annet	M	1	1	43	44	1	L	Y	L	L	C	1	3
Annet	M	1	1	67	67	0	R	N	L	L	C	0	3
Annet	M	1	1	67	70	3	R	Y	L	L	C	0	3
Annet	M	1	1	71	71	0	L	N	L	L	C	0	3
Annet	M	1	1	71	72	1	R	Y	L	L	C	1	3
Annet	M	1	1	72	72	0	L	Y	L	L	C	0	3
Annet	M	1	1	84	87	3	R	N	L	L	C	0	3
Annet	M	1	1	87	89	2	R	Y	L	L	C	0	3
Annet	M	1	1	87	89	2	L	Y	L	L	C	0	3
Annet	M	1	1	90	94	4	R	Y	L	L	C	0	3
Annet	M	1	1	90	94	4	L	Y	L	L	C	0	3
Annet	M	1	1	94	95	1	R	Y	L	L	C	0	3
Annet	M	1	1	94	95	1	L	Y	L	L	C	0	3
Annet	M	1	1	98	98	0	L	N	L	L	C	0	3
Annet	M	1	1	100	100	0	L	Y	L	L	C	0	3
Annet	M	1	1	103	104	1	R	Y	L	L	C	1	3
Annet	M	1	1	104	112	8	R	Y	L	L	C	0	3
Annet	M	1	1	115	116	1	R	Y	L	L	C	0	3
Annet	M	1	1	116	117	1	L	N	L	L	C	0	3
Annet	M	1	1	118	120	2	R	N	L	L	C	0	3
Annet	M	1	2	0	7	7	R	Y	R	R	C	1	3
Annet	M	1	2	14	21	7	R	Y	R	R	C	1	3
Annet	M	1	2	29	37	8	R	Y	R	R	C	1	3
Annet	M	1	2	44	52	8	R	Y	R	R	C	1	3
Annet	M	1	2	57	57	0	R	Y	R	R	C	0	3
Annet	M	1	2	58	67	9	R	Y	R	R	C	1	3
Annet	M	2	1	0	1	1	R	N	L	L	C	0	3
Annet	M	2	1	1	2	1	R	Y	L	L	C	1	3
Annet	M	2	1	10	13	3	R	N	L	L	C	0	3
Annet	M	2	1	13	16	3	L	Y	L	L	C	1	3
Annet	M	2	1	27	28	1	R	N	L	L	C	0	3
Annet	M	2	1	28	30	2	R	N	L	L	C	0	3
Annet	M	2	1	30	32	2	R	N	L	L	C	0	3
Annet	M	2	1	32	33	1	R	N	L	L	C	0	3
Annet	M	2	1	35	35	0	L	Y	L	L	C	1	3
Annet	M	2	1	46	48	2	R	N	L	L	C	0	3
Annet	M	2	1	49	55	6	R	Y	L	L	C	1	3
Annet	M	2	1	70	72	2	R	N	L	L	C	0	3
Annet	M	2	1	72	74	2	R	Y	L	L	C	1	3
Annet	M	2	1	75	79	4	L	Y	L	L	C	0	3
Annet	M	2	2	0	5	5	R	Y	R	R	C	1	3
Annet	M	2	2	9	11	2	R	Y	R	R	C	0	3
Annet	M	2	2	12	18	6	R	Y	R	R	C	1	3
Annet	M	2	2	22	23	1	R	Y	R	R	C	0	3
Annet	M	2	2	24	31	7	R	Y	R	R	C	1	3
Annet	M	2	2	36	36	0	R	N	R	R	C	0	3
Annet	M	2	2	37	44	7	R	Y	R	R	C	1	3
Annet	M	2	2	48	49	1	R	Y	R	R	C	0	3
Annet	M	2	2	50	55	5	R	Y	R	R	C	1	3
Annet	M	3	1	1	2	1	R	Y	L	L	C	0	3
Annet	M	3	1	4	8	4	R	N	L	L	C	0	3
Annet	M	3	1	8	9	1	R	Y	L	L	C	0	3
Annet	M	3	1	8	9	1	L	Y	L	L	C	0	3
Annet	M	3	1	19	19	0	R	N	L	L	C	0	3
Annet	M	3	1	19	25	6	R	Y	L	L	C	1	3
Annet	M	3	1	29	31	2	R	Y	L	L	C	0	3
Annet	M	3	1	32	34	2	R	N	L	L	C	0	3
Annet	M	3	1	34	34	0	R	Y	L	L	C	0	3
Annet	M	3	1	34	34	0	L	Y	L	L	C	1	3
Annet	M	3	1	43	45	2	R	N	L	L	C	0	3
Annet	M	3	1	45	45	0	L	N	L	L	C	0	3
Annet	M	3	1	49	51	2	R	N	L	L	C	0	3
Annet	M	3	1	52	55	3	R	N	L	L	C	0	3
Annet	M	3	1	56	56	0	L	N	L	L	C	0	3
Annet	M	3	1	64	65	1	R	N	L	L	C	0	3
Annet	M	3	1	65	70	5	R	Y	L	L	C	1	3
Annet	M	3	1	82	87	5	R	Y	L	L	C	1	3
Annet	M	3	1	87	92	5	R	Y	L	L	C	0	3
Annet	M	3	1	95	97	2	R	N	L	L	C	0	3
Annet	M	3	1	97	97	0	L	N	L	L	C	0	3
Annet	M	3	1	98	103	5	R	N	L	L	C	0	3
Annet	M	3	1	110	110	0	R	N	L	L	C	0	3
Annet	M	3	1	111	116	5	R	N	L	L	C	0	3
Annet	M	3	1	117	119	2	R	Y	L	L	C	1	3
Annet	M	3	2	1	7	6	R	Y	R	R	C	1	3
Annet	M	3	2	8	10	2	R	N	C	R	InC	0	3
Annet	M	3	2	12	19	7	R	Y	R	R	C	1	3
Annet	M	3	2	26	28	2	R	Y	R	R	C	0	3
Annet	M	3	2	28	31	3	R	Y	R	R	C	0	3
Annet	M	3	2	34	35	1	R	Y	R	R	C	0	3
Annet	M	3	2	41	47	6	R	Y	R	R	C	1	3
Annet	M	3	2	52	60	8	R	Y	R	R	C	1	3
Annet	M	3	2	65	67	2	R	Y	R	R	C	0	3
Annet	M	3	2	67	73	6	R	Y	R	R	C	1	3
Annet	M	4	1	0	0	0	L	N	L	L	C	0	3
Annet	M	4	1	6	7	1	L	Y	L	L	C	0	3
Annet	M	4	1	10	12	2	R	Y	L	L	C	0	3
Annet	M	4	1	17	18	1	L	Y	L	L	C	0	3
Annet	M	4	1	18	20	2	R	N	L	L	C	0	3
Annet	M	4	1	23	32	9	R	N	L	L	C	0	3
Annet	M	4	1	33	35	2	R	Y	L	L	C	0	3
Annet	M	4	1	56	59	3	R	Y	L	L	C	0	3
Annet	M	4	1	59	61	2	L	Y	L	L	C	1	3
Annet	M	4	1	70	81	11	R	Y	L	L	C	1	3
Annet	M	4	1	89	91	2	R	N	L	L	C	0	3
Annet	M	4	1	92	94	2	R	Y	L	L	C	0	3
Annet	M	4	1	102	102	0	R	N	L	L	C	0	3
Annet	M	4	1	103	109	6	R	Y	L	L	C	1	3
Annet	M	4	1	116	119	3	R	Y	L	L	C	1	3
Annet	M	4	1	120	120	0	R	Y	L	L	C	0	3
Annet	M	4	2	0	5	5	R	Y	R	R	C	0	3
Annet	M	4	2	6	6	0	R	N	R	R	C	0	3
Annet	M	4	2	7	8	1	R	Y	R	R	C	0	3
Annet	M	4	2	14	16	2	R	Y	R	R	C	1	3
Annet	M	4	2	17	23	6	R	Y	R	R	C	0	3
Annet	M	4	2	26	27	1	R	Y	R	R	C	0	3
Annet	M	4	2	28	35	7	R	Y	R	R	C	1	3
Annet	M	4	2	38	47	9	R	Y	R	R	C	1	3
Annet	M	4	2	50	56	6	R	Y	R	R	C	1	3
Annet	M	4	2	60	66	6	R	Y	R	R	C	1	3
Annet	S	1	1	1	2	1	L	Y	L	L	C	0	2
Annet	S	1	1	2	4	2	L	Y	L	L	C	0	2
Annet	S	1	1	5	5	0	R	Y	L	L	C	0	2
Annet	S	1	1	23	25	2	R	N	L	L	C	0	2
Annet	S	1	1	26	36	10	R	N	L	L	C	0	2
Annet	S	1	1	39	42	3	L	Y	L	L	C	0	2
Annet	S	1	1	42	46	4	R	Y	L	L	C	0	2
Annet	S	1	1	47	49	2	R	Y	L	L	C	0	2
Annet	S	1	1	60	65	5	R	Y	L	L	C	0	2
Annet	S	1	1	67	68	1	R	N	L	L	C	0	2
Annet	S	1	1	79	79	0	L	N	L	L	C	0	2
Annet	S	1	1	79	86	7	L	Y	L	L	C	0	2
Annet	S	1	1	92	96	4	L	Y	L	L	C	0	2
Annet	S	1	1	97	99	2	L	Y	L	L	C	0	2
Annet	S	1	1	114	120	6	R	Y	L	L	C	0	2
Annet	S	1	2	1	2	1	R	Y	R	R	C	0	2
Annet	S	1	2	2	5	3	R	Y	R	R	C	0	2
Annet	S	1	2	6	7	1	R	Y	R	R	C	0	2
Annet	S	1	2	8	12	4	R	Y	R	R	C	0	2
Annet	S	1	2	13	14	1	R	Y	R	R	C	0	2
Annet	S	1	2	24	28	4	R	N	R	R	C	0	2
Annet	S	1	2	50	51	1	R	Y	R	R	C	0	2
Annet	S	1	2	53	54	1	R	Y	R	R	C	0	2
Annet	S	1	2	54	56	2	R	Y	C	R	InC	0	2
Annet	S	1	2	67	72	5	R	Y	R	R	C	0	2
Annet	S	1	2	72	76	4	R	Y	R	R	C	0	2
Annet	S	1	2	92	99	7	R	Y	R	R	C	0	2
Annet	S	1	2	100	102	2	R	N	R	R	C	0	2
Annet	S	2	1	0	4	4	L	Y	L	L	C	0	2
Annet	S	2	1	5	12	7	R	Y	L	L	C	0	2
Annet	S	2	1	93	97	4	R	Y	L	L	C	0	2
Annet	S	2	1	98	101	3	R	N	L	L	C	0	2
Annet	S	2	2	0	5	5	R	Y	R	R	C	0	2
Fimi	F	1	1	1	3	2	R	Y	R	R	C	0	2
Fimi	F	1	1	6	9	3	L	Y	C	R	InC	0	2
Fimi	F	1	1	10	11	1	L	Y	R	R	C	0	2
Fimi	F	1	1	14	23	9	R	Y	R	R	C	0	2
Fimi	F	1	1	32	35	3	R	Y	R	R	C	0	2
Fimi	F	1	1	119	120	1	R	Y	R	R	C	0	2
Fimi	F	1	2	1	2	1	R	Y	L	L	C	0	2
Fimi	F	1	2	12	16	4	L	Y	L	L	C	0	2
Fimi	F	1	2	116	117	1	L	Y	L	L	C	0	2
Fimi	F	1	2	117	120	3	L	Y	C	L	InC	0	2
Fimi	F	2	1	0	9	9	R	Y	R	R	C	0	2
Fimi	F	2	2	0	3	3	R	Y	L	L	C	0	2
Fimi	M	1	1	4	16	12	R	Y	R	R	C	1	3
Fimi	M	1	1	28	32	4	R	Y	R	R	C	1	3
Fimi	M	1	1	38	40	2	R	Y	R	R	C	1	3
Fimi	M	1	1	54	61	7	R	Y	R	R	C	1	3
Fimi	M	1	1	68	74	6	R	Y	R	R	C	1	3
Fimi	M	1	1	106	110	4	R	Y	R	R	C	2	3
Fimi	M	1	2	2	12	10	L	Y	L	L	C	1	3
Fimi	M	1	2	25	28	3	R	N	L	L	C	0	3
Fimi	M	1	2	30	33	3	R	Y	L	L	C	1	3
Fimi	M	1	2	41	46	5	R	Y	L	L	C	1	3
Fimi	M	1	2	52	57	5	R	Y	L	L	C	1	3
Fimi	M	1	2	63	66	3	R	N	L	L	C	0	3
Fimi	M	1	2	67	68	1	R	Y	L	L	C	1	3
Fimi	M	2	1	1	6	5	R	Y	R	R	C	1	3
Fimi	M	2	1	16	19	3	R	Y	R	R	C	1	3
Fimi	M	2	1	26	44	18	R	Y	R	R	C	1	3
Fimi	M	2	1	54	62	8	R	Y	R	R	C	1	3
Fimi	M	2	1	69	76	7	R	Y	R	R	C	1	3
Fimi	M	2	2	0	6	6	R	Y	L	L	C	1	3
Fimi	M	2	2	15	19	4	R	Y	L	L	C	1	3
Fimi	M	2	2	26	27	1	R	N	L	L	C	0	3
Fimi	M	2	2	30	31	1	R	Y	L	L	C	1	3
Fimi	M	2	2	40	44	4	R	Y	L	L	C	1	3
Fimi	M	2	2	52	53	1	R	N	L	L	C	0	3
Fimi	M	2	2	55	60	5	R	Y	L	L	C	1	3
Fimi	M	3	1	0	2	2	R	Y	R	R	C	1	3
Fimi	M	3	1	12	16	4	R	Y	R	R	C	1	3
Fimi	M	3	1	22	29	7	R	Y	R	R	C	1	3
Fimi	M	3	1	33	36	3	R	Y	R	R	C	1	3
Fimi	M	3	1	38	39	1	R	Y	R	R	C	0	3
Fimi	M	3	1	62	63	1	R	N	R	R	C	0	3
Fimi	M	3	1	66	72	6	R	Y	R	R	C	1	3
Fimi	M	3	2	3	8	5	R	Y	L	L	C	1	3
Fimi	M	3	2	18	22	4	R	Y	L	L	C	1	3
Fimi	M	3	2	75	76	1	R	Y	L	L	C	1	3
Fimi	M	3	2	78	79	1	R	Y	L	L	C	0	3
Fimi	M	3	2	86	91	5	R	Y	L	L	C	1	3
Fimi	M	3	2	97	102	5	R	Y	L	L	C	1	3
Fimi	M	4	1	4	4	0	R	Y	R	R	C	1	3
Fimi	M	4	1	6	6	0	R	Y	R	R	C	0	3
Fimi	M	4	1	9	9	0	R	Y	R	R	C	0	3
Fimi	M	4	1	11	11	0	R	Y	R	R	C	0	3
Fimi	M	4	1	19	20	1	R	Y	R	R	C	1	3
Fimi	M	4	1	37	44	7	R	Y	R	R	C	1	3
Fimi	M	4	1	51	54	3	R	Y	R	R	C	1	3
Fimi	M	4	1	57	57	0	R	N	R	R	C	0	3
Fimi	M	4	1	63	64	1	R	N	R	R	C	0	3
Fimi	M	4	1	67	68	1	R	Y	R	R	C	0	3
Fimi	M	4	1	69	70	1	R	N	R	R	C	0	3
Fimi	M	4	1	73	74	1	R	Y	R	R	C	0	3
Fimi	M	4	1	75	77	2	R	Y	R	R	C	1	3
Fimi	M	4	2	1	4	3	R	Y	L	L	C	1	3
Fimi	M	4	2	18	24	6	R	Y	L	L	C	1	3
Fimi	M	4	2	32	38	6	R	Y	L	L	C	1	3
Fimi	M	4	2	44	51	7	R	Y	L	L	C	1	3
Fimi	M	4	2	57	62	5	R	Y	L	L	C	1	3
Fimi	S	1	1	0	7	7	R	Y	R	R	C	0	1
Fimi	S	1	1	8	16	8	R	Y	R	R	C	0	1
Fimi	S	1	1	73	80	7	R	Y	R	R	C	0	1
Fimi	S	1	1	90	98	8	R	Y	R	R	C	0	1
Fimi	S	1	2	0	7	7	R	Y	L	L	C	0	1
Fimi	S	1	2	7	13	6	R	Y	C	L	InC	0	1
Fimi	S	2	1	2	3	1	R	Y	R	R	C	0	1
Fimi	S	2	1	5	10	5	R	Y	R	R	C	0	1
Fimi	S	2	1	12	17	5	R	Y	R	R	C	0	1
Fimi	S	2	1	19	25	6	L	Y	R	R	C	0	1
Fimi	S	2	1	101	110	9	R	Y	R	R	C	0	1
Fimi	S	2	1	112	116	4	L	Y	R	R	C	0	1
Fimi	S	2	1	119	120	1	R	N	R	R	C	0	1
Fimi	S	2	1	120	120	0	L	Y	R	R	C	0	1
Fimi	S	2	2	0	0	0	R	N	L	L	C	0	1
Fimi	S	2	2	2	14	12	L	Y	L	L	C	0	1
Fimi	S	2	2	15	15	0	L	N	C	L	InC	0	1
Fimi	S	2	2	15	15	0	R	N	C	L	InC	0	1
Fimi	S	2	2	17	17	0	R	N	L	L	C	0	1
Fimi	S	2	2	18	23	5	L	Y	L	L	C	0	1
Fimi	S	2	2	24	26	2	R	Y	L	L	C	0	1
Fimi	S	2	2	28	36	8	R	Y	C	L	InC	0	1
Fimi	S	2	2	46	46	0	L	Y	L	L	C	0	1
Fimi	S	2	2	47	51	4	L	Y	L	L	C	0	1
Jahaga	F	1	1	1	2	1	L	Y	R	R	C	0	1
Jahaga	F	1	1	16	19	3	L	Y	R	R	C	0	1
Jahaga	F	1	1	20	22	2	R	Y	R	R	C	0	1
Jahaga	F	1	1	33	37	4	R	Y	R	R	C	0	1
Jahaga	F	1	1	40	40	0	R	Y	R	R	C	0	1
Jahaga	F	1	1	40	41	1	R	Y	R	R	C	0	1
Jahaga	F	1	1	49	51	2	L	Y	R	R	C	0	1
Jahaga	F	1	1	50	51	1	R	Y	R	R	C	0	1
Jahaga	F	1	1	81	84	3	R	Y	R	R	C	0	1
Jahaga	F	1	1	102	102	0	R	Y	R	R	C	0	1
Jahaga	F	1	1	104	112	8	L	Y	R	R	C	0	1
Jahaga	F	1	1	108	113	5	R	Y	R	R	C	0	1
Jahaga	F	1	1	113	115	2	L	Y	R	R	C	0	1
Jahaga	F	1	1	115	115	0	L	N	R	R	C	0	1
Jahaga	F	1	2	2	8	6	L	Y	L	L	C	0	1
Jahaga	F	1	2	21	24	3	L	Y	L	L	C	0	1
Jahaga	F	1	2	46	51	5	R	Y	L	L	C	0	1
Jahaga	F	1	2	53	64	11	L	Y	L	L	C	0	1
Jahaga	F	1	2	84	89	5	L	Y	L	L	C	0	1
Jahaga	F	1	2	92	96	4	L	Y	C	L	InC	0	1
Jahaga	F	1	2	108	110	2	L	Y	L	L	C	0	1
Jahaga	F	2	1	2	5	3	L	Y	L	R	InC	0	1
Jahaga	F	2	1	2	5	3	R	Y	R	R	C	0	1
Jahaga	F	2	1	36	37	1	L	N	L	R	InC	0	1
Jahaga	F	2	1	36	38	2	R	Y	R	R	C	0	1
Jahaga	F	2	1	61	61	0	R	N	C	R	InC	0	1
Jahaga	F	2	1	71	73	2	L	Y	R	R	C	0	1
Jahaga	F	2	1	85	85	0	L	N	L	R	InC	0	1
Jahaga	F	2	1	116	120	4	L	Y	R	R	C	0	1
Jahaga	F	2	2	1	6	5	L	Y	L	L	C	0	1
Jahaga	F	2	2	8	10	2	L	Y	L	L	C	0	1
Jahaga	F	2	2	12	13	1	L	Y	L	L	C	0	1
Jahaga	F	2	2	25	29	4	L	Y	L	L	C	0	1
Jahaga	F	2	2	47	47	0	L	N	L	L	C	0	1
Jahaga	F	2	2	55	56	1	L	N	C	L	InC	0	1
Jahaga	F	2	2	58	60	2	L	N	C	L	InC	0	1
Jahaga	F	2	2	85	86	1	L	N	L	L	C	0	1
Jahaga	F	2	2	86	87	1	L	N	L	L	C	0	1
Jahaga	F	2	2	94	107	13	L	Y	C	L	InC	0	1
Jahaga	F	2	2	110	112	2	L	N	C	L	InC	0	1
Jahaga	F	2	2	112	113	1	L	Y	L	L	C	0	1
Jahaga	F	2	2	115	115	0	L	N	L	L	C	0	1
Jahaga	F	2	2	116	120	4	L	Y	L	L	C	0	1
Jahaga	M	1	1	3	6	3	R	Y	R	R	C	0	3
Jahaga	M	1	1	7	12	5	L	Y	R	R	C	1	3
Jahaga	M	1	1	21	29	8	L	Y	R	R	C	1	3
Jahaga	M	1	1	39	46	7	L	Y	R	R	C	1	3
Jahaga	M	1	1	50	55	5	L	Y	R	R	C	1	3
Jahaga	M	1	1	60	66	6	L	Y	R	R	C	1	3
Jahaga	M	1	2	0	8	8	L	Y	L	L	C	1	3
Jahaga	M	1	2	15	23	8	L	Y	L	L	C	1	3
Jahaga	M	1	2	43	50	7	L	Y	L	L	C	1	3
Jahaga	M	1	2	58	66	8	L	Y	L	L	C	1	3
Jahaga	M	1	2	66	66	0	L	N	L	L	C	0	3
Jahaga	M	1	2	75	81	6	L	Y	L	L	C	1	3
Jahaga	M	2	1	0	4	4	R	Y	R	R	C	1	3
Jahaga	M	2	1	1	4	3	L	Y	R	R	C	0	3
Jahaga	M	2	1	9	10	1	L	N	R	R	C	0	3
Jahaga	M	2	1	10	10	0	R	N	R	R	C	0	3
Jahaga	M	2	1	11	15	4	L	N	R	R	C	0	3
Jahaga	M	2	1	11	12	1	R	N	R	R	C	0	3
Jahaga	M	2	1	15	17	2	R	N	R	R	C	0	3
Jahaga	M	2	1	21	22	1	R	Y	R	R	C	0	3
Jahaga	M	2	1	21	22	1	L	Y	R	R	C	1	3
Jahaga	M	2	1	22	34	12	R	Y	C	R	InC	0	3
Jahaga	M	2	1	24	24	0	L	N	C	R	InC	0	3
Jahaga	M	2	1	33	35	2	L	Y	R	R	C	0	3
Jahaga	M	2	1	37	45	8	L	Y	R	R	C	1	3
Jahaga	M	2	1	37	49	12	R	Y	R	R	C	0	3
Jahaga	M	2	1	54	59	5	R	Y	R	R	C	0	3
Jahaga	M	2	1	59	63	4	R	Y	C	R	InC	0	3
Jahaga	M	2	1	55	62	7	L	Y	R	R	C	1	3
Jahaga	M	2	1	73	76	3	R	N	R	R	C	0	3
Jahaga	M	2	1	78	79	1	R	N	R	R	C	0	3
Jahaga	M	2	1	82	84	2	L	Y	R	R	C	1	3
Jahaga	M	2	1	83	85	2	R	Y	R	R	C	0	3
Jahaga	M	2	1	86	86	0	L	Y	R	R	C	0	3
Jahaga	M	2	2	2	3	1	L	N	L	L	C	0	3
Jahaga	M	2	2	10	22	12	L	Y	L	L	C	1	3
Jahaga	M	2	2	31	33	2	L	Y	L	L	C	1	3
Jahaga	M	2	2	46	54	8	L	Y	L	L	C	1	3
Jahaga	M	2	2	57	63	6	L	Y	L	L	C	1	3
Jahaga	M	2	2	67	85	18	L	Y	L	L	C	1	3
Jahaga	M	3	1	1	4	3	R	Y	R	R	C	1	3
Jahaga	M	3	1	6	8	2	L	Y	R	R	C	0	3
Jahaga	M	3	1	13	17	4	L	Y	R	R	C	1	3
Jahaga	M	3	1	22	29	7	L	Y	R	R	C	1	3
Jahaga	M	3	1	37	43	6	L	Y	C	R	InC	0	3
Jahaga	M	3	1	44	46	2	L	Y	R	R	C	0	3
Jahaga	M	3	1	41	41	0	R	N	R	R	C	0	3
Jahaga	M	3	1	43	44	1	R	Y	R	R	C	0	3
Jahaga	M	3	1	48	48	0	L	Y	R	R	C	0	3
Jahaga	M	3	1	48	50	2	R	Y	R	R	C	0	3
Jahaga	M	3	1	51	55	4	L	Y	R	R	C	1	3
Jahaga	M	3	1	64	70	6	L	Y	R	R	C	0	3
Jahaga	M	3	1	73	77	4	L	Y	R	R	C	1	3
Jahaga	M	3	2	0	4	4	L	Y	L	L	C	1	3
Jahaga	M	3	2	13	22	9	L	Y	L	L	C	1	3
Jahaga	M	3	2	34	38	4	L	Y	L	L	C	1	3
Jahaga	M	3	2	50	57	7	L	Y	L	L	C	0	3
Jahaga	M	3	2	58	73	15	L	Y	L	L	C	1	3
Jahaga	M	3	2	81	87	6	L	Y	L	L	C	0	3
Jahaga	M	3	2	88	90	2	L	N	L	L	C	0	3
Jahaga	M	3	2	91	95	4	L	Y	L	L	C	0	3
Jahaga	M	3	2	96	100	4	L	Y	L	L	C	1	3
Jahaga	M	4	1	3	4	1	R	N	R	R	C	0	3
Jahaga	M	4	1	5	10	5	L	Y	R	R	C	0	3
Jahaga	M	4	1	12	16	4	L	Y	R	R	C	0	3
Jahaga	M	4	1	21	25	4	L	Y	R	R	C	1	3
Jahaga	M	4	1	37	39	2	R	Y	R	R	C	0	3
Jahaga	M	4	1	42	48	6	L	Y	R	R	C	1	3
Jahaga	M	4	1	55	61	6	R	Y	R	R	C	1	3
Jahaga	M	4	1	70	76	6	R	Y	R	R	C	1	3
Jahaga	M	4	1	80	84	4	R	Y	R	R	C	1	3
Jahaga	M	4	2	0	5	5	L	Y	L	L	C	1	3
Jahaga	M	4	2	11	19	8	L	Y	L	L	C	1	3
Jahaga	M	4	2	24	25	1	L	N	L	L	C	0	3
Jahaga	M	4	2	26	36	10	L	Y	L	L	C	1	3
Jahaga	M	4	2	33	46	13	R	Y	L	L	C	0	3
Jahaga	M	4	2	51	60	9	R	Y	L	L	C	0	3
Jahaga	M	4	2	71	75	4	R	Y	L	L	C	0	3
Jahaga	M	4	2	43	43	0	L	N	L	L	C	0	3
Jahaga	M	4	2	46	46	0	L	Y	L	L	C	0	3
Jahaga	M	4	2	47	55	8	L	Y	L	L	C	1	3
Jahaga	M	4	2	68	73	5	L	Y	L	L	C	0	3
Jahaga	M	4	2	74	74	0	L	Y	L	L	C	0	3
Jahaga	M	4	2	75	77	2	L	Y	L	L	C	1	3
Jahaga	S	1	1	0	3	3	L	Y	R	R	C	0	2
Jahaga	S	1	1	2	17	15	R	Y	R	R	C	0	2
Jahaga	S	1	1	8	16	8	L	Y	R	R	C	0	2
Jahaga	S	1	1	18	18	0	R	Y	R	R	C	0	2
Jahaga	S	1	1	31	32	1	R	N	R	R	C	0	2
Jahaga	S	1	1	38	41	3	L	Y	R	R	C	0	2
Jahaga	S	1	1	45	46	1	L	Y	R	R	C	0	2
Jahaga	S	1	1	47	52	5	R	Y	R	R	C	0	2
Jahaga	S	1	1	63	64	1	L	N	R	R	C	0	2
Jahaga	S	1	1	64	66	2	L	Y	R	R	C	0	2
Jahaga	S	1	1	68	70	2	L	Y	R	R	C	0	2
Jahaga	S	1	1	72	79	7	L	Y	R	R	C	0	2
Jahaga	S	1	1	73	98	25	R	Y	R	R	C	0	2
Jahaga	S	1	1	80	86	6	L	Y	R	R	C	0	2
Jahaga	S	1	1	87	88	1	L	Y	R	R	C	0	2
Jahaga	S	1	1	100	104	4	L	N	R	R	C	0	2
Jahaga	S	1	1	99	107	8	R	N	R	R	C	0	2
Jahaga	S	1	1	117	120	3	L	Y	R	R	C	0	2
Jahaga	S	1	1	117	120	3	R	Y	R	R	C	0	2
Jahaga	S	1	2	0	5	5	L	Y	L	L	C	0	2
Jahaga	S	1	2	8	11	3	L	Y	L	L	C	0	2
Jahaga	S	1	2	11	14	3	L	N	L	L	C	0	2
Jahaga	S	1	2	52	60	8	L	Y	L	L	C	0	2
Jahaga	S	1	2	61	61	0	L	N	L	L	C	0	2
Jahaga	S	1	2	61	62	1	R	Y	L	L	C	0	2
Jahaga	S	1	2	62	62	0	L	N	L	L	C	0	2
Jahaga	S	1	2	70	75	5	L	Y	L	L	C	0	2
Jahaga	S	1	2	89	90	1	L	Y	C	L	InC	0	2
Jahaga	S	1	2	91	103	12	L	Y	L	L	C	0	2
Jahaga	S	1	2	104	105	1	R	N	L	L	C	0	2
Jahaga	S	1	2	109	114	5	L	Y	L	L	C	0	2
Jahaga	S	1	2	110	110	0	R	N	C	L	InC	0	2
Jahaga	S	2	1	1	6	5	L	Y	R	R	C	0	2
Jahaga	S	2	1	0	14	14	R	Y	R	R	C	0	2
Jahaga	S	2	1	40	44	4	R	Y	R	R	C	0	2
Jahaga	S	2	1	63	66	3	L	Y	R	R	C	0	2
Jahaga	S	2	1	85	87	2	L	Y	R	R	C	0	2
Jahaga	S	2	1	105	111	6	L	Y	C	R	InC	0	2
Jahaga	S	2	1	116	117	1	R	Y	R	R	C	0	2
Jahaga	S	2	2	0	8	8	L	Y	L	L	C	0	2
Jahaga	S	2	2	17	23	6	L	Y	L	L	C	0	2
Jahaga	S	2	2	35	35	0	L	N	L	L	C	0	2
Jahaga	S	2	2	36	39	3	L	Y	L	L	C	0	2
Jahaga	S	2	2	66	69	3	L	Y	L	L	C	0	2
Jahaga	S	2	2	72	74	2	L	Y	L	L	C	0	2
Jahaga	S	2	2	80	81	1	L	Y	L	L	C	0	2
Jahaga	S	2	2	89	92	3	L	Y	L	L	C	0	2
Jahaga	S	2	2	93	94	1	L	Y	L	L	C	0	2
Jahaga	S	2	2	95	96	1	L	Y	L	L	C	0	2
Jahaga	S	2	2	118	119	1	L	Y	L	L	C	0	2
Kara	F	1	1	2	4	2	R	Y	C	R	InC	0	1
Kara	F	1	1	5	8	3	R	Y	R	R	C	0	1
Kara	F	1	1	9	12	3	R	Y	R	R	C	0	1
Kara	F	1	1	12	12	0	R	N	R	R	C	0	1
Kara	F	1	1	13	15	2	R	Y	R	R	C	0	1
Kara	F	1	1	16	17	1	R	Y	R	R	C	0	1
Kara	F	1	1	19	21	2	R	Y	R	R	C	0	1
Kara	F	1	1	36	38	2	R	Y	R	R	C	0	1
Kara	F	1	1	42	44	2	R	N	C	R	InC	0	1
Kara	F	1	1	46	48	2	R	Y	R	R	C	0	1
Kara	F	1	1	49	50	1	R	Y	R	R	C	0	1
Kara	F	1	1	51	52	1	R	Y	R	R	C	0	1
Kara	F	1	1	58	60	2	R	Y	L	R	InC	0	1
Kara	F	1	1	61	63	2	R	Y	L	R	InC	0	1
Kara	F	1	1	76	78	2	R	Y	R	R	C	0	1
Kara	F	1	1	79	82	3	R	Y	C	R	InC	0	1
Kara	F	1	1	83	84	1	R	Y	C	R	InC	0	1
Kara	F	1	1	84	90	6	L	N	L	R	InC	0	1
Kara	F	1	1	85	91	6	R	N	C	R	InC	0	1
Kara	F	1	2	1	1	0	R	Y	C	L	InC	0	1
Kara	F	1	2	1	2	1	R	Y	L	L	C	0	1
Kara	F	1	2	18	20	2	R	Y	L	L	C	0	1
Kara	F	1	2	23	26	3	R	Y	L	L	C	0	1
Kara	F	1	2	27	28	1	R	Y	L	L	C	0	1
Kara	F	1	2	39	41	2	R	Y	C	L	InC	0	1
Kara	F	1	2	113	115	2	R	Y	C	L	InC	0	1
Kara	F	1	2	116	118	2	R	Y	R	L	InC	0	1
Kara	F	2	1	1	6	5	R	Y	R	R	C	0	1
Kara	F	2	1	7	8	1	R	Y	R	R	C	0	1
Kara	F	2	1	15	18	3	R	Y	C	R	InC	0	1
Kara	F	2	1	20	21	1	R	Y	C	R	InC	0	1
Kara	F	2	1	26	28	2	R	Y	C	R	InC	0	1
Kara	F	2	1	69	71	2	R	Y	R	R	C	0	1
Kara	F	2	1	87	89	2	R	Y	C	R	InC	0	1
Kara	F	2	2	2	9	7	R	Y	L	L	C	0	1
Kara	F	2	2	10	13	3	R	Y	L	L	C	0	1
Kara	F	2	2	58	58	0	R	N	C	L	InC	0	1
Kara	F	2	2	59	61	2	R	Y	L	L	C	0	1
Kara	F	2	2	61	63	2	R	Y	L	L	C	0	1
Kara	F	2	2	66	67	1	R	Y	L	L	C	0	1
Kara	F	2	2	68	69	1	R	Y	L	L	C	0	1
Kara	F	2	2	74	74	0	R	Y	C	L	InC	0	1
Kara	F	2	2	76	76	0	R	Y	R	L	InC	0	1
Kara	F	2	2	91	94	3	R	Y	C	L	InC	0	1
Kara	M	1	1	2	6	4	R	Y	R	R	C	1	3
Kara	M	1	1	12	16	4	R	Y	R	R	C	1	3
Kara	M	1	1	23	26	3	R	Y	R	R	C	0	3
Kara	M	1	1	27	31	4	R	Y	R	R	C	1	3
Kara	M	1	1	35	35	0	R	Y	C	R	InC	0	3
Kara	M	1	1	36	36	0	R	N	R	R	C	0	3
Kara	M	1	1	37	38	1	R	N	C	R	InC	0	3
Kara	M	1	1	38	41	3	R	Y	R	R	C	1	3
Kara	M	1	1	51	52	1	R	Y	C	R	InC	0	3
Kara	M	1	1	52	55	3	R	Y	R	R	C	0	3
Kara	M	1	1	56	57	1	R	Y	C	R	InC	0	3
Kara	M	1	1	58	59	1	R	Y	C	R	InC	0	3
Kara	M	1	1	65	67	2	R	Y	R	R	C	1	3
Kara	M	1	2	2	6	4	R	Y	L	L	C	1	3
Kara	M	1	2	13	18	5	R	Y	L	L	C	1	3
Kara	M	1	2	23	27	4	R	Y	L	L	C	1	3
Kara	M	1	2	36	36	0	R	Y	L	L	C	0	3
Kara	M	1	2	37	40	3	R	Y	L	L	C	1	3
Kara	M	1	2	48	49	1	R	Y	C	L	InC	0	3
Kara	M	1	2	50	53	3	R	Y	L	L	C	1	3
Kara	M	2	1	2	3	1	R	Y	R	R	C	1	3
Kara	M	2	1	12	15	3	R	Y	R	R	C	1	3
Kara	M	2	1	25	30	5	R	Y	R	R	C	1	3
Kara	M	2	1	38	38	0	R	Y	R	R	C	0	3
Kara	M	2	1	40	40	0	R	Y	R	R	C	1	3
Kara	M	2	1	47	47	0	R	Y	R	R	C	0	3
Kara	M	2	1	48	49	1	R	Y	R	R	C	1	3
Kara	M	2	2	1	5	4	R	Y	L	L	C	1	3
Kara	M	2	2	9	12	3	R	Y	L	L	C	1	3
Kara	M	2	2	13	15	2	R	Y	L	L	C	0	3
Kara	M	2	2	23	25	2	R	Y	L	L	C	1	3
Kara	M	2	2	26	28	2	R	Y	L	L	C	0	3
Kara	M	2	2	47	48	1	R	Y	C	L	InC	0	3
Kara	M	2	2	49	50	1	R	Y	L	L	C	1	3
Kara	M	2	2	65	66	1	R	Y	L	L	C	1	3
Kara	M	3	1	1	4	3	R	Y	R	R	C	1	3
Kara	M	3	1	10	12	2	R	Y	R	R	C	1	3
Kara	M	3	1	19	21	2	R	Y	R	R	C	1	3
Kara	M	3	1	30	30	0	R	N	R	R	C	0	3
Kara	M	3	1	31	32	1	R	N	R	R	C	0	3
Kara	M	3	1	33	35	2	R	Y	C	R	InC	0	3
Kara	M	3	1	36	37	1	R	Y	R	R	C	1	3
Kara	M	3	1	53	53	0	R	Y	R	R	C	1	3
Kara	M	3	2	2	5	3	R	Y	L	L	C	1	3
Kara	M	3	2	15	16	1	R	Y	C	L	InC	0	3
Kara	M	3	2	16	17	1	R	N	L	L	C	0	3
Kara	M	3	2	18	19	1	R	Y	L	L	C	1	3
Kara	M	3	2	21	22	1	R	Y	L	L	C	0	3
Kara	M	3	2	34	42	8	R	Y	L	L	C	1	3
Kara	M	3	2	48	60	12	R	Y	L	L	C	1	3
Kara	M	3	2	64	70	6	R	Y	L	L	C	1	3
Kara	M	4	1	1	4	3	R	Y	R	R	C	1	3
Kara	M	4	1	14	16	2	R	Y	R	R	C	0	3
Kara	M	4	1	17	18	1	R	Y	C	R	InC	0	3
Kara	M	4	1	19	20	1	R	Y	R	R	C	1	3
Kara	M	4	1	31	34	3	R	Y	C	R	InC	0	3
Kara	M	4	1	35	35	0	R	N	C	R	InC	0	3
Kara	M	4	1	37	39	2	R	Y	R	R	C	1	3
Kara	M	4	1	58	64	6	R	Y	R	R	C	1	3
Kara	M	4	1	85	89	4	R	Y	C	R	InC	0	3
Kara	M	4	1	89	91	2	R	Y	C	R	InC	0	3
Kara	M	4	1	92	94	2	R	Y	R	R	C	1	3
Kara	M	4	2	0	1	1	R	Y	L	L	C	1	3
Kara	M	4	2	4	5	1	R	Y	L	L	C	0	3
Kara	M	4	2	12	14	2	R	Y	L	L	C	1	3
Kara	M	4	2	17	19	2	R	Y	L	L	C	0	3
Kara	M	4	2	27	34	7	R	Y	L	L	C	1	3
Kara	M	4	2	48	48	0	R	Y	C	L	InC	0	3
Kara	M	4	2	49	56	7	R	Y	L	L	C	1	3
Kara	M	4	2	61	68	7	R	Y	L	L	C	1	3
Kara	S	1	1	1	4	3	R	Y	R	R	C	0	2
Kara	S	1	1	5	8	3	R	Y	C	R	InC	0	2
Kara	S	1	1	9	11	2	R	Y	C	R	InC	0	2
Kara	S	1	1	12	16	4	R	Y	R	R	C	0	2
Kara	S	1	1	44	47	3	R	Y	R	R	C	0	2
Kara	S	1	1	47	50	3	R	Y	R	R	C	0	2
Kara	S	1	1	51	52	1	R	Y	R	R	C	0	2
Kara	S	1	1	53	56	3	R	Y	R	R	C	0	2
Kara	S	1	1	58	61	3	R	Y	L	R	InC	0	2
Kara	S	1	1	69	73	4	R	Y	R	R	C	0	2
Kara	S	1	1	74	77	3	R	N	R	R	C	0	2
Kara	S	1	1	78	81	3	R	Y	R	R	C	0	2
Kara	S	1	1	90	96	6	R	Y	R	R	C	0	2
Kara	S	1	1	98	100	2	R	Y	C	R	InC	0	2
Kara	S	1	1	101	104	3	R	Y	R	R	C	0	2
Kara	S	1	1	106	108	2	R	Y	R	R	C	0	2
Kara	S	1	1	111	112	1	R	Y	R	R	C	0	2
Kara	S	1	2	2	5	3	R	Y	L	L	C	0	2
Kara	S	1	2	5	13	8	R	Y	L	L	C	0	2
Kara	S	1	2	13	14	1	R	Y	L	L	C	0	2
Kara	S	1	2	15	17	2	R	Y	L	L	C	0	2
Kara	S	1	2	18	19	1	R	Y	L	L	C	0	2
Kara	S	1	2	20	20	0	R	Y	L	L	C	0	2
Kara	S	1	2	23	23	0	R	Y	L	L	C	0	2
Kara	S	1	2	30	33	3	R	Y	L	L	C	0	2
Kara	S	1	2	35	36	1	R	Y	L	L	C	0	2
Kara	S	1	2	38	38	0	R	Y	C	L	InC	0	2
Kara	S	1	2	38	39	1	R	Y	C	L	InC	0	2
Kara	S	1	2	39	39	0	R	N	L	L	C	0	2
Kara	S	1	2	40	40	0	R	Y	L	L	C	0	2
Kara	S	1	2	41	41	0	R	N	L	L	C	0	2
Kara	S	1	2	43	43	0	R	N	R	L	InC	0	2
Kara	S	1	2	43	44	1	R	Y	R	L	InC	0	2
Kara	S	1	2	88	92	4	R	Y	L	L	C	0	2
Kara	S	1	2	93	95	2	R	Y	L	L	C	0	2
Kara	S	1	2	96	97	1	R	N	C	L	InC	0	2
Kara	S	1	2	106	106	0	R	Y	C	L	InC	0	2
Kara	S	1	2	107	107	0	R	Y	C	L	InC	0	2
Kara	S	1	2	108	110	2	R	Y	L	L	C	0	2
Kara	S	1	2	113	116	3	R	Y	L	L	C	0	2
Kara	S	1	2	117	120	3	R	Y	L	L	C	0	2
Kara	S	2	1	2	4	2	R	Y	R	R	C	0	2
Kara	S	2	1	7	7	0	R	Y	R	R	C	0	2
Kara	S	2	1	12	13	1	R	Y	C	R	InC	0	2
Kara	S	2	1	17	24	7	R	Y	R	R	C	0	2
Kara	S	2	1	31	33	2	R	Y	L	R	InC	0	2
Kara	S	2	1	34	36	2	R	Y	C	R	InC	0	2
Kara	S	2	1	94	97	3	R	Y	R	R	C	0	2
Kara	S	2	1	99	101	2	R	N	C	R	InC	0	2
Kara	S	2	1	108	110	2	R	Y	R	R	C	0	2
Kara	S	2	1	116	117	1	R	Y	C	R	InC	0	2
Kara	S	2	2	1	3	2	R	Y	L	L	C	0	2
Kara	S	2	2	6	6	0	R	Y	L	L	C	0	2
Kara	S	2	2	7	8	1	R	Y	L	L	C	0	2
Kara	S	2	2	10	10	0	R	N	L	L	C	0	2
Kara	S	2	2	14	16	2	R	Y	L	L	C	0	2
Kara	S	2	2	118	119	1	R	Y	C	L	InC	0	2
Kofi	F	1	1	0	1	1	R	Y	R	R	C	0	1
Kofi	F	1	1	1	5	4	R	Y	R	R	C	0	1
Kofi	F	1	1	5	5	0	R	Y	C	R	InC	0	1
Kofi	F	1	1	6	8	2	R	Y	R	R	C	0	1
Kofi	F	1	1	10	10	0	R	Y	R	R	C	0	1
Kofi	F	1	1	11	13	2	R	Y	C	R	InC	0	1
Kofi	F	1	1	20	29	9	R	Y	R	R	C	0	1
Kofi	F	1	1	30	32	2	R	Y	L	R	InC	0	1
Kofi	F	1	1	58	62	4	R	Y	L	R	InC	0	1
Kofi	F	1	1	73	78	5	R	Y	R	R	C	0	1
Kofi	F	1	1	80	84	4	R	Y	R	R	C	0	1
Kofi	F	1	2	0	2	2	R	Y	L	L	C	0	1
Kofi	F	1	2	2	8	6	R	Y	L	L	C	0	1
Kofi	F	1	2	9	10	1	R	Y	L	L	C	0	1
Kofi	F	1	2	11	12	1	R	Y	L	L	C	0	1
Kofi	F	1	2	14	15	1	R	Y	L	L	C	0	1
Kofi	F	1	2	24	25	1	R	Y	L	L	C	0	1
Kofi	F	1	2	28	28	0	L	Y	L	L	C	0	1
Kofi	F	1	2	29	31	2	L	Y	L	L	C	0	1
Kofi	F	1	2	63	63	0	R	N	L	L	C	0	1
Kofi	F	1	2	66	70	4	R	Y	L	L	C	0	1
Kofi	F	1	2	71	76	5	R	Y	L	L	C	0	1
Kofi	F	1	2	86	87	1	R	Y	L	L	C	0	1
Kofi	F	2	1	0	6	6	R	Y	R	R	C	0	1
Kofi	F	2	1	7	12	5	R	Y	R	R	C	0	1
Kofi	F	2	1	17	19	2	R	Y	R	R	C	0	1
Kofi	F	2	1	20	21	1	R	Y	C	R	InC	0	1
Kofi	F	2	1	24	27	3	R	Y	C	R	InC	0	1
Kofi	F	2	1	30	33	3	R	Y	R	R	C	0	1
Kofi	F	2	1	34	35	1	R	Y	L	R	InC	0	1
Kofi	F	2	1	41	45	4	R	Y	R	R	C	0	1
Kofi	F	2	1	47	48	1	R	Y	R	R	C	0	1
Kofi	F	2	1	55	57	2	R	Y	R	R	C	0	1
Kofi	F	2	1	57	60	3	R	Y	R	R	C	0	1
Kofi	F	2	1	61	62	1	R	Y	R	R	C	0	1
Kofi	F	2	1	82	87	5	R	Y	R	R	C	0	1
Kofi	F	2	1	88	91	3	R	Y	R	R	C	0	1
Kofi	F	2	1	91	93	2	R	Y	L	R	InC	0	1
Kofi	F	2	1	105	107	2	R	Y	R	R	C	0	1
Kofi	F	2	1	108	110	2	R	Y	R	R	C	0	1
Kofi	F	2	2	0	0	0	R	Y	C	L	InC	0	1
Kofi	F	2	2	1	7	6	R	Y	L	L	C	0	1
Kofi	F	2	2	17	18	1	R	Y	L	L	C	0	1
Kofi	F	2	2	29	30	1	R	Y	C	L	InC	0	1
Kofi	F	2	2	31	39	8	R	Y	L	L	C	0	1
Kofi	F	2	2	39	41	2	R	Y	L	L	C	0	1
Kofi	F	2	2	68	72	4	R	Y	L	L	C	0	1
Kofi	F	2	2	72	75	3	R	Y	L	L	C	0	1
Kofi	F	2	2	76	77	1	R	Y	L	L	C	0	1
Kofi	F	2	2	81	83	2	R	Y	L	L	C	0	1
Kofi	F	2	2	84	85	1	R	Y	L	L	C	0	1
Kofi	F	2	2	86	87	1	R	Y	L	L	C	0	1
Kofi	M	1	1	1	1	0	R	Y	R	R	C	0	3
Kofi	M	1	1	3	5	2	R	Y	R	R	C	1	3
Kofi	M	1	1	21	25	4	R	Y	R	R	C	1	3
Kofi	M	1	1	33	36	3	R	Y	R	R	C	1	3
Kofi	M	1	1	51	52	1	R	Y	R	R	C	0	3
Kofi	M	1	1	53	55	2	R	Y	R	R	C	1	3
Kofi	M	1	1	63	64	1	R	Y	C	R	InC	0	3
Kofi	M	1	1	65	68	3	R	Y	R	R	C	1	3
Kofi	M	1	2	2	4	2	R	Y	L	L	C	1	3
Kofi	M	1	2	16	17	1	R	Y	L	L	C	1	3
Kofi	M	1	2	27	28	1	R	Y	L	L	C	0	3
Kofi	M	1	2	29	30	1	R	Y	L	L	C	1	3
Kofi	M	1	2	44	44	0	R	Y	C	L	InC	0	3
Kofi	M	1	2	45	50	5	R	Y	L	L	C	1	3
Kofi	M	1	2	60	66	6	R	Y	L	L	C	1	3
Kofi	M	1	2	109	112	3	R	Y	L	L	C	0	3
Kofi	M	2	1	0	0	0	R	N	C	R	InC	0	3
Kofi	M	2	1	1	2	1	R	Y	R	R	C	1	3
Kofi	M	2	1	2	4	2	R	Y	L	R	InC	0	3
Kofi	M	2	1	14	19	5	R	Y	C	R	InC	1	3
Kofi	M	2	1	23	24	1	R	Y	C	R	InC	0	3
Kofi	M	2	1	25	27	2	R	Y	C	R	InC	0	3
Kofi	M	2	1	28	28	0	R	Y	R	R	C	1	3
Kofi	M	2	1	40	46	6	R	Y	R	R	C	1	3
Kofi	M	2	1	48	50	2	R	Y	C	R	InC	0	3
Kofi	M	2	1	52	52	0	R	Y	R	R	C	1	3
Kofi	M	2	1	51	51	0	R	N	C	R	InC	0	3
Kofi	M	2	1	112	116	4	R	Y	R	R	C	2	3
Kofi	M	2	2	0	1	1	R	Y	L	L	C	0	3
Kofi	M	2	2	1	3	2	R	Y	L	L	C	1	3
Kofi	M	2	2	4	5	1	R	Y	L	L	C	0	3
Kofi	M	2	2	18	23	5	R	Y	L	L	C	1	3
Kofi	M	2	2	43	45	2	R	Y	L	L	C	1	3
Kofi	M	2	2	58	64	6	R	Y	L	L	C	1	3
Kofi	M	2	2	74	77	3	R	N	L	L	C	0	3
Kofi	M	2	2	78	83	5	R	Y	L	L	C	1	3
Kofi	M	3	1	0	3	3	R	Y	R	R	C	1	3
Kofi	M	3	1	11	12	1	R	N	C	R	InC	0	3
Kofi	M	3	1	13	14	1	R	Y	R	R	C	0	3
Kofi	M	3	1	15	16	1	R	Y	C	R	InC	0	3
Kofi	M	3	1	17	22	5	R	Y	R	R	C	1	3
Kofi	M	3	1	32	35	3	R	Y	R	R	C	1	3
Kofi	M	3	1	42	43	1	R	N	C	R	InC	0	3
Kofi	M	3	1	46	47	1	R	Y	C	R	InC	0	3
Kofi	M	3	1	48	50	2	R	Y	C	R	InC	0	3
Kofi	M	3	1	50	50	0	R	Y	L	R	InC	0	3
Kofi	M	3	1	52	57	5	R	Y	C	R	InC	0	3
Kofi	M	3	1	58	58	0	R	N	L	R	InC	0	3
Kofi	M	3	1	59	63	4	R	Y	C	R	InC	0	3
Kofi	M	3	1	64	68	4	R	Y	R	R	C	1	3
Kofi	M	3	1	74	79	5	R	Y	R	R	C	1	3
Kofi	M	3	2	1	3	2	R	Y	L	L	C	1	3
Kofi	M	3	2	12	17	5	R	Y	L	L	C	1	3
Kofi	M	3	2	21	23	2	R	Y	L	L	C	0	3
Kofi	M	3	2	23	25	2	R	Y	L	L	C	0	3
Kofi	M	3	2	26	26	0	R	Y	L	L	C	0	3
Kofi	M	3	2	27	28	1	R	Y	C	L	InC	0	3
Kofi	M	3	2	29	30	1	R	Y	L	L	C	1	3
Kofi	M	3	2	41	46	5	R	Y	L	L	C	1	3
Kofi	M	3	2	52	61	9	R	Y	L	L	C	1	3
Kofi	M	3	2	82	83	1	R	Y	L	L	C	2	3
Kofi	M	4	1	1	6	5	R	Y	C	R	InC	0	3
Kofi	M	4	1	7	10	3	R	Y	R	R	C	1	3
Kofi	M	4	1	18	19	1	R	Y	C	R	InC	0	3
Kofi	M	4	1	20	20	0	R	Y	C	R	InC	0	3
Kofi	M	4	1	21	22	1	R	Y	C	R	InC	0	3
Kofi	M	4	1	22	23	1	R	Y	L	R	InC	0	3
Kofi	M	4	1	24	27	3	R	Y	C	R	InC	0	3
Kofi	M	4	1	28	28	0	R	Y	L	R	InC	0	3
Kofi	M	4	1	31	32	1	R	Y	C	R	InC	0	3
Kofi	M	4	1	32	33	1	R	Y	C	R	InC	0	3
Kofi	M	4	1	36	39	3	R	Y	R	R	C	1	3
Kofi	M	4	1	44	47	3	R	Y	R	R	C	1	3
Kofi	M	4	1	57	62	5	R	Y	R	R	C	1	3
Kofi	M	4	1	73	75	2	R	Y	C	R	InC	0	3
Kofi	M	4	1	75	80	5	R	Y	C	R	InC	0	3
Kofi	M	4	1	81	88	7	R	Y	C	R	InC	0	3
Kofi	M	4	1	89	92	3	R	Y	C	R	InC	0	3
Kofi	M	4	1	94	98	4	R	Y	R	R	C	1	3
Kofi	M	4	2	1	3	2	R	Y	L	L	C	1	3
Kofi	M	4	2	17	17	0	R	Y	C	L	InC	0	3
Kofi	M	4	2	18	21	3	R	Y	L	L	C	0	3
Kofi	M	4	2	21	22	1	R	Y	L	L	C	0	3
Kofi	M	4	2	23	25	2	R	Y	L	L	C	0	3
Kofi	M	4	2	26	27	1	R	Y	L	L	C	0	3
Kofi	M	4	2	28	28	0	R	Y	C	L	InC	0	3
Kofi	M	4	2	29	35	6	R	Y	L	L	C	1	3
Kofi	M	4	2	40	44	4	R	Y	L	L	C	0	3
Kofi	M	4	2	44	49	5	R	Y	L	L	C	1	3
Kofi	M	4	2	55	63	8	R	Y	L	L	C	1	3
Kofi	M	4	2	71	76	5	R	Y	L	L	C	1	3
Kofi	S	1	1	0	2	2	R	Y	R	R	C	0	2
Kofi	S	1	1	2	5	3	R	Y	R	R	C	0	2
Kofi	S	1	1	7	8	1	R	Y	R	R	C	0	2
Kofi	S	1	1	10	14	4	R	Y	R	R	C	0	2
Kofi	S	1	1	15	16	1	R	Y	L	R	InC	0	2
Kofi	S	1	1	20	22	2	R	Y	R	R	C	0	2
Kofi	S	1	1	24	30	6	R	Y	R	R	C	0	2
Kofi	S	1	1	31	32	1	R	Y	L	R	InC	0	2
Kofi	S	1	1	33	33	0	R	N	R	R	C	0	2
Kofi	S	1	1	51	58	7	R	Y	R	R	C	0	2
Kofi	S	1	1	58	61	3	R	Y	C	R	InC	0	2
Kofi	S	1	1	65	65	0	L	N	C	R	InC	0	2
Kofi	S	1	1	66	69	3	L	Y	R	R	C	0	2
Kofi	S	1	1	72	75	3	R	Y	R	R	C	0	2
Kofi	S	1	1	76	83	7	R	Y	R	R	C	0	2
Kofi	S	1	1	86	88	2	R	Y	R	R	C	0	2
Kofi	S	1	1	114	120	6	R	Y	R	R	C	0	2
Kofi	S	1	2	0	0	0	R	Y	L	L	C	0	2
Kofi	S	1	2	1	26	25	R	Y	L	L	C	0	2
Kofi	S	1	2	27	28	1	R	Y	L	L	C	0	2
Kofi	S	1	2	32	33	1	R	Y	L	L	C	0	2
Kofi	S	1	2	35	37	2	R	Y	L	L	C	0	2
Kofi	S	1	2	52	56	4	R	Y	L	L	C	0	2
Kofi	S	1	2	57	59	2	R	Y	L	L	C	0	2
Kofi	S	1	2	99	103	4	R	Y	L	L	C	0	2
Kofi	S	1	2	103	105	2	R	N	L	L	C	0	2
Kofi	S	2	1	0	2	2	R	Y	C	R	InC	0	2
Kofi	S	2	1	3	8	5	R	Y	R	R	C	0	2
Kofi	S	2	1	8	13	5	R	Y	C	R	InC	0	2
Kofi	S	2	1	56	62	6	R	Y	R	R	C	0	2
Kofi	S	2	2	1	7	6	R	Y	L	L	C	0	2
Kofi	S	2	2	8	10	2	R	Y	L	L	C	0	2
Kofi	S	2	2	12	15	3	R	Y	L	L	C	0	2
Kofi	S	2	2	31	33	2	L	Y	C	L	InC	0	2
Kofi	S	2	2	36	42	6	R	Y	L	L	C	0	2
Kofi	S	2	2	43	47	4	R	Y	L	L	C	0	2
Kofi	S	2	2	82	93	11	R	Y	L	L	C	0	2
Kofi	S	2	2	120	120	0	R	Y	L	L	C	0	2
Limbuko	F	1	1	1	1	0	R	N	L	L	C	0	2
Limbuko	F	1	1	3	5	2	R	N	L	L	C	0	2
Limbuko	F	1	1	6	7	1	R	N	L	L	C	0	2
Limbuko	F	1	1	11	15	4	R	Y	L	L	C	0	2
Limbuko	F	1	1	16	17	1	L	Y	L	L	C	0	2
Limbuko	F	1	1	18	21	3	L	Y	L	L	C	0	2
Limbuko	F	1	1	22	23	1	R	Y	R	L	InC	0	2
Limbuko	F	1	1	24	26	2	L	Y	L	L	C	0	2
Limbuko	F	1	1	28	37	9	R	N	L	L	C	0	2
Limbuko	F	1	1	47	51	4	L	Y	L	L	C	0	2
Limbuko	F	1	1	56	57	1	L	Y	L	L	C	0	2
Limbuko	F	1	1	58	58	0	R	N	L	L	C	0	2
Limbuko	F	1	1	59	60	1	R	Y	R	L	InC	0	2
Limbuko	F	1	1	61	62	1	L	Y	L	L	C	0	2
Limbuko	F	1	1	66	73	7	R	Y	L	L	C	0	2
Limbuko	F	1	1	73	73	0	L	N	L	L	C	0	2
Limbuko	F	1	1	75	75	0	R	Y	R	L	InC	0	2
Limbuko	F	1	1	77	80	3	R	Y	R	L	InC	0	2
Limbuko	F	1	1	83	91	8	L	Y	L	L	C	0	2
Limbuko	F	1	1	99	100	1	L	N	L	L	C	0	2
Limbuko	F	1	2	4	5	1	R	Y	R	R	C	0	2
Limbuko	F	1	2	71	73	2	R	Y	R	R	C	0	2
Limbuko	F	1	2	75	76	1	R	N	R	R	C	0	2
Limbuko	F	1	2	92	94	2	L	N	R	R	C	0	2
Limbuko	F	2	1	0	1	1	L	Y	L	L	C	0	2
Limbuko	F	2	1	2	3	1	L	Y	L	L	C	0	2
Limbuko	F	2	1	4	5	1	L	Y	L	L	C	0	2
Limbuko	F	2	2	1	3	2	R	Y	R	R	C	0	2
Limbuko	F	2	2	5	6	1	R	Y	R	R	C	0	2
Limbuko	M	1	1	0	1	1	L	N	L	L	C	0	3
Limbuko	M	1	1	2	2	0	L	Y	L	L	C	1	3
Limbuko	M	1	1	12	12	0	L	N	L	L	C	0	3
Limbuko	M	1	1	13	15	2	L	Y	L	L	C	1	3
Limbuko	M	1	1	20	22	2	L	N	L	L	C	0	3
Limbuko	M	1	1	23	24	1	L	Y	L	L	C	1	3
Limbuko	M	1	1	31	32	1	L	Y	L	L	C	1	3
Limbuko	M	1	1	43	43	0	L	Y	L	L	C	1	3
Limbuko	M	1	1	51	53	2	L	Y	L	L	C	2	3
Limbuko	M	1	2	1	2	1	R	Y	R	R	C	1	3
Limbuko	M	1	2	15	16	1	R	Y	R	R	C	1	3
Limbuko	M	1	2	25	26	1	R	Y	R	R	C	0	3
Limbuko	M	1	2	27	28	1	R	Y	R	R	C	1	3
Limbuko	M	1	2	35	36	1	R	Y	R	R	C	1	3
Limbuko	M	1	2	37	37	0	R	N	R	R	C	0	3
Limbuko	M	1	2	44	46	2	R	Y	R	R	C	1	3
Limbuko	M	1	2	57	57	0	R	Y	R	R	C	2	3
Limbuko	M	1	2	58	59	1	R	Y	R	R	C	0	3
Limbuko	M	2	1	0	1	1	L	Y	L	L	C	1	3
Limbuko	M	2	1	11	12	1	L	Y	L	L	C	1	3
Limbuko	M	2	1	20	21	1	L	Y	L	L	C	1	3
Limbuko	M	2	1	30	31	1	L	Y	C	L	InC	0	3
Limbuko	M	2	1	33	34	1	L	Y	C	L	InC	0	3
Limbuko	M	2	1	35	36	1	L	Y	L	L	C	1	3
Limbuko	M	2	1	43	44	1	L	Y	L	L	C	1	3
Limbuko	M	2	2	0	1	1	L	Y	R	R	C	1	3
Limbuko	M	2	2	10	11	1	L	Y	R	R	C	1	3
Limbuko	M	2	2	17	19	2	L	Y	R	R	C	1	3
Limbuko	M	2	2	26	28	2	L	Y	R	R	C	1	3
Limbuko	M	2	2	34	37	3	L	N	R	R	C	0	3
Limbuko	M	2	2	38	40	2	L	Y	R	R	C	1	3
Limbuko	M	3	1	1	4	3	L	Y	L	L	C	1	3
Limbuko	M	3	1	10	11	1	L	Y	L	L	C	1	3
Limbuko	M	3	1	17	19	2	L	Y	L	L	C	1	3
Limbuko	M	3	1	26	28	2	L	Y	L	L	C	1	3
Limbuko	M	3	1	37	40	3	L	Y	L	L	C	1	3
Limbuko	M	3	2	2	4	2	L	Y	R	R	C	1	3
Limbuko	M	3	2	7	12	5	L	Y	R	R	C	1	3
Limbuko	M	3	2	17	30	13	L	Y	R	R	C	1	3
Limbuko	M	3	2	33	42	9	L	Y	R	R	C	1	3
Limbuko	M	3	2	49	49	0	L	N	R	R	C	0	3
Limbuko	M	3	2	50	55	5	L	Y	R	R	C	1	3
Limbuko	M	4	1	0	3	3	L	Y	L	L	C	1	3
Limbuko	M	4	1	9	11	2	L	Y	L	L	C	1	3
Limbuko	M	4	1	14	14	0	L	N	L	L	C	0	3
Limbuko	M	4	1	18	20	2	L	Y	L	L	C	1	3
Limbuko	M	4	1	29	30	1	L	Y	L	L	C	0	3
Limbuko	M	4	1	31	33	2	L	Y	L	L	C	1	3
Limbuko	M	4	1	41	45	4	L	Y	L	L	C	1	3
Limbuko	M	4	1	72	73	1	L	Y	L	L	C	2	3
Limbuko	M	4	2	1	1	0	R	Y	R	R	C	0	3
Limbuko	M	4	2	2	2	0	R	Y	R	R	C	1	3
Limbuko	M	4	2	9	9	0	R	Y	R	R	C	0	3
Limbuko	M	4	2	10	11	1	R	Y	R	R	C	1	3
Limbuko	M	4	2	22	22	0	R	Y	R	R	C	0	3
Limbuko	M	4	2	24	24	0	R	Y	R	R	C	1	3
Limbuko	M	4	2	35	35	0	R	Y	R	R	C	1	3
Limbuko	M	4	2	37	38	1	R	Y	R	R	C	0	3
Limbuko	M	4	2	47	49	2	R	Y	R	R	C	1	3
Limbuko	M	4	2	60	60	0	R	Y	R	R	C	0	3
Limbuko	M	4	2	61	63	2	R	Y	R	R	C	2	3
Limbuko	S	1	1	0	1	1	L	Y	L	L	C	0	1
Limbuko	S	1	1	2	3	1	L	Y	L	L	C	0	1
Limbuko	S	1	1	57	58	1	R	N	L	L	C	0	1
Limbuko	S	1	2	8	11	3	L	Y	R	R	C	0	1
Limbuko	S	1	2	12	13	1	L	N	R	R	C	0	1
Limbuko	S	1	2	15	15	0	L	N	R	R	C	0	1
Limbuko	S	2	1	0	3	3	L	Y	L	L	C	0	1
Limbuko	S	2	1	4	6	2	L	N	L	L	C	0	1
Limbuko	S	2	1	12	16	4	L	Y	L	L	C	0	1
Limbuko	S	2	2	1	4	3	R	Y	R	R	C	0	1
Luiza	F	1	1	3	5	2	R	Y	L	L	C	0	1
Luiza	F	1	1	6	7	1	R	N	L	L	C	0	1
Luiza	F	1	1	9	20	11	R	Y	L	L	C	0	1
Luiza	F	1	1	27	31	4	R	Y	L	L	C	0	1
Luiza	F	1	1	37	43	6	L	Y	L	L	C	0	1
Luiza	F	1	1	64	65	1	R	Y	L	L	C	0	1
Luiza	F	1	1	69	72	3	L	Y	L	L	C	0	1
Luiza	F	1	2	5	9	4	R	Y	R	R	C	0	1
Luiza	F	1	2	12	13	1	R	Y	R	R	C	0	1
Luiza	F	2	1	0	3	3	R	Y	L	L	C	0	1
Luiza	F	2	1	4	7	3	L	Y	L	L	C	0	1
Luiza	F	2	1	5	6	1	R	Y	L	L	C	0	1
Luiza	F	2	1	56	62	6	L	Y	L	L	C	0	1
Luiza	F	2	1	63	65	2	L	Y	L	L	C	0	1
Luiza	F	2	2	0	3	3	R	Y	R	R	C	0	1
Luiza	F	2	2	3	4	1	R	Y	R	R	C	0	1
Luiza	M	1	1	0	0	0	R	N	L	L	C	0	3
Luiza	M	1	1	1	2	1	R	Y	L	L	C	0	3
Luiza	M	1	1	4	5	1	R	Y	L	L	C	1	3
Luiza	M	1	1	15	21	6	R	Y	L	L	C	1	3
Luiza	M	1	1	36	41	5	R	Y	L	L	C	1	3
Luiza	M	1	1	47	52	5	R	Y	L	L	C	1	3
Luiza	M	1	1	58	62	4	R	Y	L	L	C	1	3
Luiza	M	1	2	0	2	2	R	Y	R	R	C	1	3
Luiza	M	1	2	17	19	2	R	Y	R	R	C	1	3
Luiza	M	1	2	31	34	3	R	Y	R	R	C	0	3
Luiza	M	1	2	38	39	1	R	Y	R	R	C	1	3
Luiza	M	1	2	49	53	4	R	Y	R	R	C	1	3
Luiza	M	1	2	60	65	5	R	Y	R	R	C	1	3
Luiza	M	2	1	7	11	4	R	Y	L	L	C	1	3
Luiza	M	2	1	41	43	2	R	Y	L	L	C	1	3
Luiza	M	2	1	50	51	1	R	N	L	L	C	0	3
Luiza	M	2	1	62	65	3	R	Y	L	L	C	1	3
Luiza	M	2	1	72	75	3	R	Y	L	L	C	1	3
Luiza	M	2	1	85	88	3	R	N	L	L	C	0	3
Luiza	M	2	2	8	11	3	R	Y	R	R	C	1	3
Luiza	M	2	2	15	18	3	R	Y	R	R	C	1	3
Luiza	M	2	2	25	28	3	R	Y	R	R	C	1	3
Luiza	M	2	2	35	39	4	R	Y	R	R	C	1	3
Luiza	M	2	2	49	50	1	R	Y	R	R	C	1	3
Luiza	M	3	1	0	2	2	R	Y	L	L	C	1	3
Luiza	M	3	1	3	4	1	R	Y	L	L	C	0	3
Luiza	M	3	1	12	16	4	R	Y	L	L	C	1	3
Luiza	M	3	1	21	23	2	R	Y	L	L	C	1	3
Luiza	M	3	1	24	26	2	R	N	L	L	C	0	3
Luiza	M	3	1	35	39	4	R	Y	L	L	C	1	3
Luiza	M	3	1	45	49	4	R	Y	L	L	C	1	3
Luiza	M	3	2	0	1	1	R	Y	R	R	C	1	3
Luiza	M	3	2	8	11	3	R	Y	R	R	C	1	3
Luiza	M	3	2	17	21	4	R	Y	R	R	C	1	3
Luiza	M	3	2	33	37	4	R	Y	R	R	C	1	3
Luiza	M	3	2	41	45	4	R	Y	R	R	C	1	3
Luiza	M	4	1	0	1	1	R	Y	L	L	C	0	3
Luiza	M	4	1	1	2	1	R	N	L	L	C	0	3
Luiza	M	4	1	3	3	0	R	Y	L	L	C	0	3
Luiza	M	4	1	4	5	1	R	N	L	L	C	0	3
Luiza	M	4	1	6	7	1	R	Y	L	L	C	1	3
Luiza	M	4	1	8	9	1	R	Y	L	L	C	0	3
Luiza	M	4	1	20	21	1	R	Y	L	L	C	0	3
Luiza	M	4	1	22	22	0	R	N	L	L	C	0	3
Luiza	M	4	1	26	30	4	R	Y	L	L	C	1	3
Luiza	M	4	1	38	38	0	R	N	L	L	C	0	3
Luiza	M	4	1	39	39	0	R	N	L	L	C	0	3
Luiza	M	4	1	41	45	4	R	N	L	L	C	0	3
Luiza	M	4	1	47	50	3	R	Y	L	L	C	1	3
Luiza	M	4	1	59	69	10	R	N	L	L	C	0	3
Luiza	M	4	1	71	73	2	R	Y	L	L	C	1	3
Luiza	M	4	1	80	86	6	R	Y	L	L	C	1	3
Luiza	M	4	2	0	0	0	R	N	R	R	C	0	3
Luiza	M	4	2	1	3	2	R	Y	R	R	C	1	3
Luiza	M	4	2	6	10	4	R	Y	R	R	C	1	3
Luiza	M	4	2	15	19	4	R	Y	R	R	C	1	3
Luiza	M	4	2	22	27	5	R	Y	R	R	C	1	3
Luiza	M	4	2	33	37	4	R	Y	R	R	C	1	3
Luiza	S	1	1	0	2	2	R	Y	L	L	C	0	2
Luiza	S	1	1	2	4	2	R	Y	L	L	C	0	2
Luiza	S	1	1	8	14	6	R	Y	L	L	C	0	2
Luiza	S	1	1	15	15	0	L	Y	L	L	C	0	2
Luiza	S	1	1	18	23	5	R	Y	L	L	C	0	2
Luiza	S	1	1	28	33	5	L	Y	L	L	C	0	2
Luiza	S	1	1	55	59	4	R	Y	L	L	C	0	2
Luiza	S	1	1	60	64	4	R	Y	L	L	C	0	2
Luiza	S	1	1	67	71	4	L	Y	L	L	C	0	2
Luiza	S	1	1	88	93	5	L	Y	L	L	C	0	2
Luiza	S	1	1	116	117	1	R	Y	L	L	C	0	2
Luiza	S	1	2	0	0	0	R	Y	R	R	C	0	2
Luiza	S	1	2	1	2	1	R	Y	R	R	C	0	2
Luiza	S	1	2	3	3	0	R	Y	R	R	C	0	2
Luiza	S	1	2	4	5	1	R	Y	R	R	C	0	2
Luiza	S	1	2	5	6	1	R	Y	R	R	C	0	2
Luiza	S	1	2	6	21	15	R	Y	R	R	C	0	2
Luiza	S	1	2	28	31	3	L	Y	R	R	C	0	2
Luiza	S	1	2	33	38	5	R	Y	R	R	C	0	2
Luiza	S	1	2	43	45	2	R	Y	R	R	C	0	2
Luiza	S	1	2	54	54	0	R	N	R	R	C	0	2
Luiza	S	1	2	55	63	8	R	Y	R	R	C	0	2
Luiza	S	1	2	69	79	10	R	Y	R	R	C	0	2
Luiza	S	1	2	91	97	6	R	Y	L	R	InC	0	2
Luiza	S	2	1	0	0	0				L		0	2
Luiza	S	2	2	0	5	5	R	Y	R	R	C	0	2
Luiza	S	2	2	82	84	2	L	Y	R	R	C	0	2
Luiza	S	2	2	85	89	4	L	Y	R	R	C	0	2
Natascha	F	1	1	1	5	4	R	Y	L	L	C	0	2
Natascha	F	1	1	7	9	2	R	Y	L	L	C	0	2
Natascha	F	1	1	10	17	7	R	Y	L	L	C	0	2
Natascha	F	1	1	73	88	15	R	Y	L	L	C	0	2
Natascha	F	1	1	119	120	1	R	Y	L	L	C	0	2
Natascha	F	1	2	1	16	15	R	Y	R	R	C	0	2
Natascha	F	1	2	34	35	1	R	Y	R	R	C	0	2
Natascha	F	1	2	49	53	4	R	Y	R	R	C	0	2
Natascha	F	2	1	2	11	9	R	Y	L	L	C	0	2
Natascha	F	2	1	53	57	4	R	Y	L	L	C	0	2
Natascha	F	2	2	55	61	6	R	Y	R	R	C	0	2
Natascha	F	2	2	120	120	0	R	Y	R	R	C	0	2
Natascha	M	1	1	0	5	5	R	Y	L	L	C	1	3
Natascha	M	1	1	9	15	6	R	Y	L	L	C	1	3
Natascha	M	1	1	21	27	6	R	Y	L	L	C	1	3
Natascha	M	1	1	30	36	6	R	Y	L	L	C	1	3
Natascha	M	1	1	40	40	0	R	Y	L	L	C	0	3
Natascha	M	1	1	41	45	4	R	Y	L	L	C	1	3
Natascha	M	1	2	1	5	4	R	Y	R	R	C	1	3
Natascha	M	1	2	10	15	5	R	Y	R	R	C	1	3
Natascha	M	1	2	19	25	6	R	Y	R	R	C	0	3
Natascha	M	1	2	27	31	4	R	Y	R	R	C	1	3
Natascha	M	1	2	35	42	7	R	Y	R	R	C	1	3
Natascha	M	1	2	45	50	5	R	Y	R	R	C	1	3
Natascha	M	2	1	21	28	7	R	Y	L	L	C	1	3
Natascha	M	2	1	32	36	4	R	Y	L	L	C	1	3
Natascha	M	2	1	43	51	8	R	Y	L	L	C	1	3
Natascha	M	2	1	54	62	8	R	Y	L	L	C	1	3
Natascha	M	2	1	71	78	7	R	Y	L	L	C	1	3
Natascha	M	2	2	15	21	6	R	Y	R	R	C	1	3
Natascha	M	2	2	24	29	5	R	Y	R	R	C	1	3
Natascha	M	2	2	34	36	2	R	Y	R	R	C	1	3
Natascha	M	2	2	46	47	1	R	Y	R	R	C	1	3
Natascha	M	2	2	83	84	1	R	Y	R	R	C	1	3
Natascha	M	3	1	12	17	5	R	Y	L	L	C	1	3
Natascha	M	3	1	22	32	10	R	Y	L	L	C	1	3
Natascha	M	3	1	37	45	8	R	Y	L	L	C	1	3
Natascha	M	3	1	49	50	1	R	Y	L	L	C	0	3
Natascha	M	3	1	56	62	6	R	Y	L	L	C	1	3
Natascha	M	3	1	65	71	6	R	Y	L	L	C	1	3
Natascha	M	3	2	0	0	0				R			3
Natascha	M	4	1	14	19	5	R	Y	L	L	C	1	3
Natascha	M	4	1	25	31	6	R	Y	L	L	C	1	3
Natascha	M	4	1	37	45	8	R	Y	L	L	C	1	3
Natascha	M	4	1	47	50	3	R	N	L	L	C	0	3
Natascha	M	4	1	52	59	7	R	Y	L	L	C	1	3
Natascha	M	4	1	62	67	5	R	Y	L	L	C	1	3
Natascha	M	4	2	1	8	7	R	Y	R	R	C	1	3
Natascha	M	4	2	15	23	8	R	Y	R	R	C	1	3
Natascha	M	4	2	27	39	12	R	Y	C	R	InC	0	3
Natascha	M	4	2	46	53	7	R	Y	R	R	C	1	3
Natascha	M	4	2	56	64	8	R	Y	R	R	C	1	3
Natascha	M	4	2	66	68	2	R	Y	R	R	C	1	3
Natascha	S	1	1	8	10	2	R	Y	L	L	C	0	1
Natascha	S	1	1	13	18	5	R	Y	L	L	C	0	1
Natascha	S	1	1	23	27	4	R	Y	L	L	C	0	1
Natascha	S	1	1	47	54	7	R	Y	L	L	C	0	1
Natascha	S	1	1	94	95	1	R	Y	L	L	C	0	1
Natascha	S	1	2	1	7	6	R	Y	R	R	C	0	1
Natascha	S	1	2	16	16	0	R	Y	R	R	C	0	1
Natascha	S	1	2	18	22	4	R	Y	R	R	C	0	1
Natascha	S	1	2	25	25	0	R	Y	R	R	C	0	1
Natascha	S	2	1	10	17	7	R	Y	L	L	C	0	1
Natascha	S	2	1	23	27	4	R	Y	L	L	C	0	1
Natascha	S	2	1	67	75	8	R	Y	L	L	C	0	1
Natascha	S	2	2	27	40	13	R	Y	R	R	C	0	1
Natascha	S	2	2	48	49	1	R	Y	C	R	InC	0	1
Pia	F	1	1	1	7	6	L	Y	L	L	C	0	1
Pia	F	1	1	7	9	2	L	Y	L	L	C	0	1
Pia	F	1	1	11	18	7	R	Y	L	L	C	0	1
Pia	F	1	1	23	23	0	R	Y	L	L	C	0	1
Pia	F	1	1	27	31	4	R	Y	L	L	C	0	1
Pia	F	1	1	45	63	18	R	Y	L	L	C	0	1
Pia	F	1	2	0	6	6	R	Y	R	R	C	0	1
Pia	F	1	2	7	10	3	R	Y	R	R	C	0	1
Pia	F	1	2	11	15	4	R	Y	R	R	C	0	1
Pia	F	1	2	16	19	3	R	Y	R	R	C	0	1
Pia	F	1	2	21	22	1	R	N	R	R	C	0	1
Pia	F	1	2	33	37	4	R	Y	R	R	C	0	1
Pia	F	1	2	61	67	6	L	Y	L	R	InC	0	1
Pia	F	1	2	69	70	1	L	N	L	R	InC	0	1
Pia	F	1	2	89	89	0	R	N	R	R	C	0	1
Pia	F	1	2	93	94	1	R	Y	R	R	C	0	1
Pia	F	2	1	1	4	3	R	Y	L	L	C	0	1
Pia	F	2	1	4	6	2	L	Y	L	L	C	0	1
Pia	F	2	1	8	11	3	L	N	L	L	C	0	1
Pia	F	2	1	15	20	5	L	Y	L	L	C	0	1
Pia	F	2	2	2	6	4	R	Y	R	R	C	0	1
Pia	F	2	2	6	15	9	R	Y	R	R	C	0	1
Pia	M	1	1	0	1	1	L	N	L	L	C	0	3
Pia	M	1	1	2	4	2	L	Y	L	L	C	1	3
Pia	M	1	1	11	12	1	L	N	L	L	C	0	3
Pia	M	1	1	13	17	4	L	Y	L	L	C	1	3
Pia	M	1	1	29	36	7	L	N	L	L	C	0	3
Pia	M	1	1	37	41	4	L	Y	L	L	C	1	3
Pia	M	1	1	46	56	10	L	Y	L	L	C	1	3
Pia	M	1	1	60	60	0	L	N	C	L	InC	0	3
Pia	M	1	1	61	63	2	L	Y	C	L	InC	0	3
Pia	M	1	1	64	69	5	L	Y	L	L	C	1	3
Pia	M	1	2	13	18	5	R	Y	R	R	C	1	3
Pia	M	1	2	25	41	16	R	Y	R	R	C	1	3
Pia	M	1	2	45	64	19	R	Y	R	R	C	0	3
Pia	M	1	2	64	68	4	R	Y	R	R	C	1	3
Pia	M	1	2	78	82	4	L	Y	R	R	C	1	3
Pia	M	1	2	89	96	7	L	Y	R	R	C	1	3
Pia	M	2	1	2	6	4	R	Y	L	L	C	1	3
Pia	M	2	1	11	19	8	R	Y	L	L	C	1	3
Pia	M	2	1	25	28	3	R	Y	L	L	C	1	3
Pia	M	2	1	35	37	2	R	N	L	L	C	0	3
Pia	M	2	1	38	42	4	R	Y	L	L	C	1	3
Pia	M	2	1	47	55	8	R	Y	L	L	C	1	3
Pia	M	2	2	5	8	3	R	Y	R	R	C	1	3
Pia	M	2	2	15	20	5	R	Y	R	R	C	1	3
Pia	M	2	2	25	28	3	R	Y	R	R	C	1	3
Pia	M	2	2	38	49	11	R	Y	R	R	C	1	3
Pia	M	2	2	56	69	13	R	Y	R	R	C	1	3
Pia	M	3	1	1	5	4	L	Y	L	L	C	1	3
Pia	M	3	1	11	14	3	L	Y	L	L	C	1	3
Pia	M	3	1	37	39	2	L	Y	L	L	C	0	3
Pia	M	3	1	41	42	1	L	Y	L	L	C	1	3
Pia	M	3	1	52	58	6	L	Y	L	L	C	1	3
Pia	M	3	1	67	71	4	L	Y	L	L	C	1	3
Pia	M	3	2	0	6	6	R	Y	R	R	C	1	3
Pia	M	3	2	11	20	9	R	Y	R	R	C	1	3
Pia	M	3	2	25	31	6	R	Y	R	R	C	0	3
Pia	M	3	2	32	33	1	R	Y	R	R	C	1	3
Pia	M	3	2	41	44	3	R	Y	C	R	InC	0	3
Pia	M	3	2	45	52	7	R	Y	R	R	C	1	3
Pia	M	3	2	58	69	11	R	Y	R	R	C	1	3
Pia	M	4	1	1	5	4	R	Y	L	L	C	1	3
Pia	M	4	1	23	33	10	R	Y	L	L	C	1	3
Pia	M	4	1	42	44	2	R	Y	L	L	C	0	3
Pia	M	4	1	52	57	5	R	Y	L	L	C	1	3
Pia	M	4	1	63	77	14	R	Y	L	L	C	1	3
Pia	M	4	1	84	87	3	R	Y	L	L	C	0	3
Pia	M	4	1	88	92	4	R	Y	L	L	C	1	3
Pia	M	4	2	0	3	3	R	Y	R	R	C	1	3
Pia	M	4	2	4	5	1	R	N	R	R	C	0	3
Pia	M	4	2	11	14	3	R	Y	R	R	C	0	3
Pia	M	4	2	14	21	7	R	Y	R	R	C	1	3
Pia	M	4	2	26	28	2	R	N	R	R	C	0	3
Pia	M	4	2	29	38	9	R	Y	R	R	C	1	3
Pia	M	4	2	45	55	10	R	N	R	R	C	0	3
Pia	M	4	2	57	59	2	R	Y	R	R	C	1	3
Pia	M	4	2	70	71	1	R	N	C	R	InC	0	3
Pia	M	4	2	71	78	7	R	Y	R	R	C	0	3
Pia	M	4	2	78	81	3	R	N	C	R	InC	0	3
Pia	M	4	2	82	83	1	R	Y	R	R	C	1	3
Pia	S	1	1	2	11	9	L	Y	L	L	C	0	2
Pia	S	1	1	12	15	3	L	N	L	L	C	0	2
Pia	S	1	1	16	16	0	L	Y	C	L	InC	0	2
Pia	S	1	1	17	20	3	L	Y	L	L	C	0	2
Pia	S	1	1	24	32	8	R	Y	L	L	C	0	2
Pia	S	1	1	34	35	1	R	Y	L	L	C	0	2
Pia	S	1	1	36	38	2	R	Y	L	L	C	0	2
Pia	S	1	1	43	59	16	L	Y	L	L	C	0	2
Pia	S	1	1	64	73	9	L	Y	L	L	C	0	2
Pia	S	1	1	75	75	0	L	N	L	L	C	0	2
Pia	S	1	1	79	80	1	L	N	L	L	C	0	2
Pia	S	1	1	82	89	7	R	Y	L	L	C	0	2
Pia	S	1	1	99	105	6	L	N	L	L	C	0	2
Pia	S	1	1	113	115	2	L	N	L	L	C	0	2
Pia	S	1	1	118	120	2	L	Y	L	L	C	0	2
Pia	S	1	2	1	6	5	R	Y	R	R	C	0	2
Pia	S	1	2	7	8	1	R	Y	R	R	C	0	2
Pia	S	1	2	14	20	6	R	Y	R	R	C	0	2
Pia	S	1	2	21	21	0	R	N	R	R	C	0	2
Pia	S	1	2	37	41	4	R	Y	R	R	C	0	2
Pia	S	1	2	42	45	3	R	Y	R	R	C	0	2
Pia	S	1	2	46	53	7	R	Y	R	R	C	0	2
Pia	S	1	2	56	59	3	L	Y	R	R	C	0	2
Pia	S	1	2	61	61	0	L	Y	R	R	C	0	2
Pia	S	1	2	63	64	1	R	Y	R	R	C	0	2
Pia	S	1	2	87	100	13	L	Y	R	R	C	0	2
Pia	S	1	2	103	107	4	R	Y	R	R	C	0	2
Pia	S	1	2	115	120	5	R	Y	R	R	C	0	2
Pia	S	2	1	1	6	5	L	Y	L	L	C	0	2
Pia	S	2	1	15	18	3	L	Y	L	L	C	0	2
Pia	S	2	1	19	24	5	R	Y	L	L	C	0	2
Pia	S	2	1	27	32	5	L	Y	L	L	C	0	2
Pia	S	2	1	33	36	3	L	Y	C	L	InC	0	2
Pia	S	2	1	95	101	6	L	Y	L	L	C	0	2
Pia	S	2	2	1	6	5	R	Y	R	R	C	0	2
Pia	S	2	2	7	14	7	R	Y	R	R	C	0	2
Pia	S	2	2	16	21	5	L	Y	R	R	C	0	2
Pia	S	2	2	70	71	1	R	Y	C	R	InC	0	2
Sandra	F	1	1	2	4	2	R	Y	R	R	C	0	2
Sandra	F	1	1	10	13	3	R	Y	R	R	C	0	2
Sandra	F	1	1	17	18	1	R	Y	C	R	InC	0	2
Sandra	F	1	1	20	20	0	R	Y	R	R	C	0	2
Sandra	F	1	1	37	38	1	R	Y	R	R	C	0	2
Sandra	F	1	1	41	44	3	R	Y	R	R	C	0	2
Sandra	F	1	1	48	50	2	R	Y	R	R	C	0	2
Sandra	F	1	1	53	67	14	R	Y	R	R	C	0	2
Sandra	F	1	1	68	68	0	R	N	R	R	C	0	2
Sandra	F	1	1	69	70	1	R	Y	R	R	C	0	2
Sandra	F	1	1	105	108	3	R	Y	R	R	C	0	2
Sandra	F	1	1	110	111	1	R	Y	R	R	C	0	2
Sandra	F	1	1	115	119	4	R	Y	R	R	C	0	2
Sandra	F	1	2	16	17	1	R	Y	L	L	C	0	2
Sandra	F	1	2	24	24	0	R	Y	L	L	C	0	2
Sandra	F	1	2	27	28	1	R	Y	L	L	C	0	2
Sandra	F	1	2	30	36	6	L	Y	L	L	C	0	2
Sandra	F	1	2	39	40	1	R	Y	L	L	C	0	2
Sandra	F	1	2	70	70	0	R	Y	L	L	C	0	2
Sandra	F	1	2	90	91	1	R	N	L	L	C	0	2
Sandra	F	1	2	109	110	1	R	Y	L	L	C	0	2
Sandra	F	1	2	112	112	0	R	Y	R	L	InC	0	2
Sandra	F	1	2	113	114	1	R	Y	R	L	InC	0	2
Sandra	F	1	2	120	120	0	L	N	L	L	C	0	2
Sandra	F	2	1	2	3	1	R	Y	R	R	C	0	2
Sandra	F	2	1	12	14	2	R	N	R	R	C	0	2
Sandra	F	2	1	28	29	1	R	Y	R	R	C	0	2
Sandra	F	2	1	30	32	2	R	Y	R	R	C	0	2
Sandra	F	2	1	34	34	0	R	Y	R	R	C	0	2
Sandra	F	2	1	35	35	0	R	Y	R	R	C	0	2
Sandra	F	2	1	45	46	1	L	Y	R	R	C	0	2
Sandra	F	2	1	64	68	4	R	Y	R	R	C	0	2
Sandra	F	2	1	105	112	7	R	Y	R	R	C	0	2
Sandra	F	2	2	2	3	1	R	N	L	L	C	0	2
Sandra	F	2	2	5	5	0	R	Y	L	L	C	0	2
Sandra	F	2	2	17	18	1	R	N	L	L	C	0	2
Sandra	F	2	2	26	27	1	R	Y	L	L	C	0	2
Sandra	F	2	2	49	50	1	R	Y	L	L	C	0	2
Sandra	M	1	1	4	5	1	R	Y	R	R	C	0	3
Sandra	M	1	1	9	11	2	R	Y	R	R	C	1	3
Sandra	M	1	1	12	14	2	R	Y	R	R	C	0	3
Sandra	M	1	1	19	19	0	R	N	R	R	C	0	3
Sandra	M	1	1	25	25	0	R	N	R	R	C	0	3
Sandra	M	1	1	27	28	1	R	N	R	R	C	0	3
Sandra	M	1	1	30	31	1	R	Y	R	R	C	1	3
Sandra	M	1	1	44	45	1	R	Y	R	R	C	0	3
Sandra	M	1	1	48	48	0	R	Y	R	R	C	0	3
Sandra	M	1	1	50	51	1	R	Y	C	R	InC	0	3
Sandra	M	1	1	52	53	1	R	N	R	R	C	0	3
Sandra	M	1	1	55	56	1	L	N	R	R	C	0	3
Sandra	M	1	1	57	61	4	R	Y	R	R	C	1	3
Sandra	M	1	1	73	74	1	R	Y	R	R	C	0	3
Sandra	M	1	1	75	78	3	R	Y	R	R	C	1	3
Sandra	M	1	1	83	86	3	R	Y	R	R	C	1	3
Sandra	M	1	2	32	32	0	R	Y	L	L	C	0	3
Sandra	M	1	2	36	37	1	R	Y	L	L	C	1	3
Sandra	M	1	2	47	47	0	R	Y	L	L	C	0	3
Sandra	M	1	2	48	51	3	R	Y	L	L	C	1	3
Sandra	M	1	2	46	59	13	R	Y	L	L	C	1	3
Sandra	M	1	2	67	71	4	R	N	L	L	C	0	3
Sandra	M	1	2	74	75	1	R	Y	L	L	C	1	3
Sandra	M	1	2	89	91	2	R	Y	L	L	C	0	3
Sandra	M	1	2	101	102	1	R	Y	L	L	C	0	3
Sandra	M	1	2	105	107	2	R	Y	L	L	C	1	3
Sandra	M	2	1	11	13	2	R	Y	R	R	C	0	3
Sandra	M	2	1	17	19	2	R	Y	R	R	C	0	3
Sandra	M	2	1	33	36	3	R	N	R	R	C	0	3
Sandra	M	2	1	42	45	3	R	Y	R	R	C	0	3
Sandra	M	2	1	46	50	4	R	Y	R	R	C	1	3
Sandra	M	2	1	54	57	3	R	Y	R	R	C	0	3
Sandra	M	2	1	58	65	7	R	Y	R	R	C	1	3
Sandra	M	2	1	69	72	3	R	Y	R	R	C	1	3
Sandra	M	2	1	73	75	2	R	Y	R	R	C	0	3
Sandra	M	2	1	78	81	3	R	Y	R	R	C	1	3
Sandra	M	2	1	86	91	5	R	Y	R	R	C	1	3
Sandra	M	2	2	22	22	0	R	Y	L	L	C	1	3
Sandra	M	2	2	29	33	4	R	Y	L	L	C	1	3
Sandra	M	2	2	37	39	2	R	Y	L	L	C	0	3
Sandra	M	2	2	40	43	3	R	Y	L	L	C	1	3
Sandra	M	2	2	47	54	7	R	Y	L	L	C	1	3
Sandra	M	2	2	58	60	2	R	N	L	L	C	0	3
Sandra	M	2	2	61	62	1	R	N	L	L	C	0	3
Sandra	M	2	2	64	64	0	R	Y	L	L	C	1	3
Sandra	M	2	2	66	66	0	R	Y	L	L	C	0	3
Sandra	M	3	1	2	3	1	R	Y	R	R	C	1	3
Sandra	M	3	1	5	6	1	R	Y	R	R	C	0	3
Sandra	M	3	1	13	15	2	R	Y	R	R	C	0	3
Sandra	M	3	1	15	16	1	R	Y	R	R	C	1	3
Sandra	M	3	1	17	20	3	R	Y	R	R	C	0	3
Sandra	M	3	1	23	28	5	R	N	R	R	C	0	3
Sandra	M	3	1	31	32	1	R	N	R	R	C	0	3
Sandra	M	3	1	35	39	4	R	Y	R	R	C	1	3
Sandra	M	3	1	44	52	8	R	Y	R	R	C	1	3
Sandra	M	3	1	57	61	4	R	Y	R	R	C	1	3
Sandra	M	3	2	50	67	17	L	Y	L	L	C	0	3
Sandra	M	3	2	72	73	1	R	Y	C	L	InC	0	3
Sandra	M	3	2	80	82	2	R	Y	L	L	C	1	3
Sandra	M	3	2	92	93	1	L	Y	L	L	C	0	3
Sandra	M	3	2	101	109	8	R	Y	L	L	C	1	3
Sandra	M	4	1	3	3	0	R	N	L	R	InC	0	3
Sandra	M	4	1	15	16	1	R	Y	R	R	C	1	3
Sandra	M	4	1	27	31	4	R	Y	R	R	C	1	3
Sandra	M	4	1	37	44	7	R	Y	R	R	C	1	3
Sandra	M	4	1	47	58	11	R	Y	R	R	C	1	3
Sandra	M	4	1	63	75	12	R	Y	R	R	C	1	3
Sandra	M	4	2	11	12	1	R	Y	L	L	C	0	3
Sandra	M	4	2	13	14	1	R	Y	L	L	C	0	3
Sandra	M	4	2	15	16	1	R	Y	L	L	C	0	3
Sandra	M	4	2	16	19	3	R	Y	L	L	C	1	3
Sandra	M	4	2	31	33	2	R	Y	L	L	C	0	3
Sandra	M	4	2	33	36	3	R	Y	L	L	C	0	3
Sandra	M	4	2	36	37	1	R	N	L	L	C	0	3
Sandra	M	4	2	38	40	2	R	N	L	L	C	0	3
Sandra	M	4	2	43	44	1	R	Y	L	L	C	1	3
Sandra	M	4	2	53	59	6	R	Y	L	L	C	1	3
Sandra	M	4	2	68	72	4	R	N	L	L	C	0	3
Sandra	M	4	2	73	73	0	R	N	L	L	C	0	3
Sandra	M	4	2	76	79	3	R	Y	L	L	C	1	3
Sandra	M	4	2	90	97	7	R	Y	L	L	C	1	3
Sandra	S	1	1	9	15	6	R	Y	R	R	C	0	1
Sandra	S	1	1	16	19	3	R	Y	R	R	C	0	1
Sandra	S	1	1	21	25	4	R	Y	R	R	C	0	1
Sandra	S	1	1	25	27	2	R	Y	R	R	C	0	1
Sandra	S	1	1	87	92	5	R	Y	R	R	C	0	1
Sandra	S	1	1	93	95	2	R	N	R	R	C	0	1
Sandra	S	1	1	102	102	0	R	Y	R	R	C	0	1
Sandra	S	1	1	103	103	0	R	N	R	R	C	0	1
Sandra	S	1	1	104	104	0	R	Y	R	R	C	0	1
Sandra	S	1	1	113	114	1	R	Y	R	R	C	0	1
Sandra	S	1	1	117	120	3	R	Y	R	R	C	0	1
Sandra	S	1	2	1	1	0	L	Y	L	L	C	0	1
Sandra	S	1	2	13	15	2	R	Y	L	L	C	0	1
Sandra	S	1	2	19	23	4	R	Y	L	L	C	0	1
Sandra	S	1	2	69	73	4	R	Y	L	L	C	0	1
Sandra	S	1	2	73	74	1	R	Y	L	L	C	0	1
Sandra	S	1	2	75	76	1	R	Y	L	L	C	0	1
Sandra	S	1	2	83	87	4	R	Y	L	L	C	0	1
Sandra	S	2	1	6	7	1	R	Y	R	R	C	0	1
Sandra	S	2	1	13	16	3	R	Y	R	R	C	0	1
Sandra	S	2	1	18	19	1	R	Y	R	R	C	0	1
Sandra	S	2	1	23	25	2	R	Y	R	R	C	0	1
Sandra	S	2	1	27	29	2	R	Y	R	R	C	0	1
Sandra	S	2	1	42	43	1	R	Y	R	R	C	0	1
Sandra	S	2	1	58	62	4	R	Y	R	R	C	0	1
Sandra	S	2	1	66	73	7	R	Y	R	R	C	0	1
Sandra	S	2	1	78	82	4	R	Y	R	R	C	0	1
Sandra	S	2	2	6	7	1	R	Y	L	L	C	0	1
Sandra	S	2	2	9	10	1	R	Y	L	L	C	0	1
Sandra	S	2	2	28	30	2	L	Y	L	L	C	0	1
Sandra	S	2	2	41	41	0	R	Y	R	L	InC	0	1
Sandra	S	2	2	44	46	2	R	Y	L	L	C	0	1
Sandra	S	2	2	63	64	1	L	Y	L	L	C	0	1
Sandra	S	2	2	90	95	5	R	Y	L	L	C	0	1
Sandra	S	2	2	96	100	4	R	Y	L	L	C	0	1
Sandra	S	2	2	114	117	3	R	Y	C	L	InC	0	1

## Sheet: Legend
CONDITION
F: Failed-look condition
S: Successful-look condition
M: Motivational condition
HAND
L: Left-handed point
R: Right-handed point
EYE CONTACT
N: No eye contact made during point
Y: eye contact made during point
POINT DIRECTION
L: Point directed to the left
C: Point directed to the center
R: Point directed to the right
GRAPE POSITION
L: Grape located on the left
R: Grape located on the right
CORRECT?
C: Point directed at grape
InC: Point not directed at grape
OBJECT RECEIVED
0 = No reward received
1 = Grape received
2 = Grapeless grapevine received
